# Supplementary material
Source: PubMed Central journal article supplement (PMC6810723)
Supplement: NIHMS1023364-supplement-Supp_fileS2.pdf [file NIHMS1023364-supplement-Supp_fileS2.pdf]

# Supporting Information File 2 for “Integrative Analysis of Genetical Genomics Data Incorporating Network Structures” by

Bin Gao<sup>1,2†</sup>, Xu Liu<sup>3†</sup>, Hongzhe Li<sup>4</sup>, and Yuehua Cui<sup>1\*</sup>

<sup>1</sup>*Department of Statistics and Probability, Michigan State University, East Lansing, MI 48824, USA*

<sup>2</sup>*Quantitative Sciences, Janssen Research & Development, LLC, Spring House, PA 19477*

<sup>3</sup>*School of Statistics and Management, Shanghai University of Finance and Economics, Shanghai 200433, China*

<sup>4</sup>*Department of Biostatistics and Epidemiology, University of Pennsylvania Perelman School of Medicine, PA 19014, USA*

†These two authors contributed equally to the work.

\*Corresponding author: [cuiy@msu.edu](mailto:cuiy@msu.edu)

This supporting information file contains a list of SNPs (eQTL) for each one of the top 3 genes listed in Table 4 in the main context, and the results for additional pathway analysis.

## 1. SNP list

Table S0: List of SNPs (eQTL) of the three selected genes in KEGG “metabolism of xenobiotics by cytochrome P450” pathway.

| CYP2E1 (ch10) |           |            |             | EPHX1 (ch1) |           |            |             | SULT2A1 (ch19) |           |            |             |
|---------------|-----------|------------|-------------|-------------|-----------|------------|-------------|----------------|-----------|------------|-------------|
| ch            | position  | dbSNP_rsID | gene symbol | ch          | position  | dbSNP_rsID | gene symbol | ch             | position  | dbSNP_rsID | gene symbol |
| 1             | 94505899  | rs7535547  | -           | 1           | 88671547  | rs10923082 | -           | 1              | 4236741   | rs2411738  | -           |
| 2             | 178678885 | rs1405645  | PDE11A      | 2           | 195812999 | rs777728   | -           | 1              | 5427658   | rs12724170 | -           |
| 3             | 127870573 | rs2139747  | -           | 2           | 211354884 | rs4233981  | -           | 2              | 172065670 | rs16859370 | METTL8      |
| 3             | 150664359 | rs4456805  | -           | 3           | 4486891   | rs2633844  | SUMF1       | 2              | 201138169 | rs6722649  | LOC26010    |
| 3             | 179064725 | rs13076136 | -           | 3           | 132888749 | rs4854829  | CPNE4       | 2              | 228754646 | rs12694772 | SPHKAP      |
| 3             | 191511082 | rs1403604  | CLDN1       | 3           | 138082512 | rs2031029  | NCK1        | 3              | 150880491 | rs1946704  | -           |
| 5             | 161035720 | rs6893149  | -           | 3           | 142535528 | rs17787621 | ZBTB38      | 4              | 38314401  | rs4073968  | -           |
| 6             | 11270212  | rs6456946  | -           | 4           | 12794110  | rs12646501 | -           | 4              | 39819270  | rs6846248  | -           |
| 6             | 143792107 | rs11155293 | ADAT2       | 4           | 167354019 | rs2292083  | TLL1        | 4              | 41164354  | rs17444017 | -           |
| 7             | 80325910  | rs1636594  | -           | 5           | 97244313  | rs6895924  | -           | 4              | 84449248  | rs4693571  | -           |
| 7             | 146110550 | rs10238991 | CNTNAP2     | 8           | 19217659  | rs10107389 | SH2D4A      | 5              | 13479104  | rs4702943  | -           |
| 7             | 148539819 | rs886712   | -           | 8           | 77726733  | rs16939329 | -           | 5              | 55615894  | rs158497   | -           |
| 8             | 23790794  | rs4872203  | -           | 9           | 107441555 | rs6477578  | -           | 5              | 143538057 | rs6876352  | KCTD16      |
| 9             | 102700439 | rs2639345  | -           | 10          | 15875283  | rs12262809 | C10orf97    | 5              | 174788017 | rs2644640  | -           |
| 10            | 21584363  | rs6482170  | -           | 10          | 18369762  | rs12358478 | SLC39A12    | 6              | 44616383  | rs736259   | -           |
| 10            | 30654280  | rs10763778 | PAPD1       | 10          | 24445562  | rs11013905 | KIAA1217    | 8              | 23790505  | rs17723874 | -           |
| 12            | 11926931  | rs2739085  | ETV6        | 10          | 69630097  | rs4746739  | MYPN        | 8              | 106377210 | rs7823980  | -           |
| 13            | 100815014 | rs7986611  | NALCN       | 10          | 107214664 | rs2611050  | -           | 10             | 15875283  | rs12262809 | C10orf97    |
| 13            | 100917657 | rs4112527  | ITGBL1      | 11          | 90015379  | rs4753018  | -           | 11             | 16702219  | rs1392998  | -           |
|               |           |            |             | 12          | 19709769  | rs10770516 | -           | 11             | 79038552  | rs651420   | -           |
|               |           |            |             | 12          | 110179096 | rs1265566  | CUX2        | 11             | 81286656  | rs1945897  | -           |
|               |           |            |             | 13          | 52868079  | rs9536409  | -           | 12             | 91363010  | rs2277364  | -           |
|               |           |            |             | 14          | 57547077  | rs17094208 | C14orf37    | 13             | 53060274  | rs9536471  | -           |
|               |           |            |             |             |           |            | LOC10013    |                |           |            |             |
|               |           |            |             | 17          | 24375446  | rs997996   | 0794        | 14             | 29229449  | rs11847410 | PRKD1       |
|               |           |            |             | 17          | 36253248  | rs2469831  | CPS1        |                |           |            |             |

## 2. Additional pathway analysis

The purpose of additional pathway analysis was to check the performance of the methods from a large number of pathways. We randomly chose 65 pathways from different KEGG categories from the KEGG website (<https://www.genome.jp/kegg/pathway.html>). We analyzed the data with the three methods: IVGC, IV and EN. The full details about the three methods can be found in the main context. Among the 65 pathways analyzed, 4 pathways have no gene passed the 0.6 selection rate threshold. Among the rest 61 pathways, IVGC has smaller prediction error than IV and EN in 26 pathways. Pathways with the smallest prediction error by using IVGC were highlighted with yellow. Below, we list the detailed results of the 65 pathways.

## Carbohydrate Metabolism

- hsa00010** [ [xml](#) | [html](#) | [graphics](#) ] Glycolysis / Gluconeogenesis
- hsa00020** [ [xml](#) | [html](#) | [graphics](#) ] Citrate cycle (TCA cycle)
- hsa00030** [ [xml](#) | [html](#) | [graphics](#) ] Pentose phosphate pathway
- hsa00040** [ [xml](#) | [html](#) | [graphics](#) ] Pentose and glucuronate interconversions
- hsa00052** [ [xml](#) | [html](#) | [graphics](#) ] Galactose metabolism

### **Glycolysis / Gluconeogenesis (hsa00010)**

There are total 68 genes in this pathway, among which 62 were mapped to this dataset. So we focused the analysis on the 62 genes. Table S1 lists the top selected genes which passed the 60% stability selection rate by using any one of the three methods (IVGC, IV and EN). Overall, the top genes have higher selection rate using IVGC than the other two methods. The prediction errors of the IVGC, IV and EN are 0.4909, 0.5307 and 0.5613, respectively, indicating good performance of IVGC in selecting important genes in this pathway.

**Table S1:** List of top selected genes with a stability selection rate >60% by using any one of the three methods (IVGC, IV and EN) for pathway *hsa00010*.

| <b>Gene Symbol</b> | <b>IVGC</b> | <b>IV</b> | <b>EN</b> |
|--------------------|-------------|-----------|-----------|
| PDHA1              | 0.94        | 0.8       | 0.99      |
| LDHAL6A            | 0.94        | 0.51      | 0.86      |
| DLAT               | 0.94        | 0.32      | 0.71      |
| PFKM               | 0.93        | 0.7       | 0.95      |
| ALDH2              | 0.93        | 0.6       | 0.92      |
| DLD                | 0.93        | 0.15      | 0.39      |
| ENO3               | 0.92        | 0.23      | 0.62      |
| ADH1B              | 0.92        | 0.14      | 0.4       |
| LDHA               | 0.92        | 0.06      | 0.4       |
| ALDOC              | 0.91        | 0.71      | 0.96      |
| ADPGK              | 0.91        | 0.61      | 0.91      |
| PKLR               | 0.91        | 0.07      | 0.17      |
| PGM2               | 0.89        | 0.24      | 0.67      |
| G6PC2              | 0.86        | 0.36      | 0.72      |
| ENO2               | 0.86        | 0.28      | 0.65      |
| GPI                | 0.86        | 0.13      | 0.34      |
| HK1                | 0.84        | 0.11      | 0.28      |
| ADH6               | 0.83        | 0.08      | 0.34      |
| LDHB               | 0.83        | 0         | 0.07      |
| PDHA2              | 0.82        | 0.41      | 0.8       |
| ACSS1              | 0.79        | 0.31      | 0.73      |
| ALDH3A2            | 0.79        | 0.27      | 0.66      |

|         |      |      |      |
|---------|------|------|------|
| ACSS2   | 0.79 | 0.23 | 0.6  |
| ALDH1B1 | 0.76 | 0.33 | 0.69 |
| ADH4    | 0.76 | 0.04 | 0.13 |
| AKR1A1  | 0.73 | 0.02 | 0.1  |
| LDHC    | 0.71 | 0.17 | 0.53 |
| ADH7    | 0.7  | 0.06 | 0.19 |
| TPI1    | 0.68 | 0.05 | 0.27 |
| ALDH3B2 | 0.67 | 0.1  | 0.36 |
| GALM    | 0.66 | 0.33 | 0.66 |
| G6PC3   | 0.61 | 0.02 | 0.16 |
| G6PC    | 0.26 | 0.22 | 0.61 |

The network connectivity plots of the 62 and the top selected genes are shown in Fig. S1. Given the tight connection information among the genes, it is not surprising to see the improved prediction performance of the IVGC method compared to others.

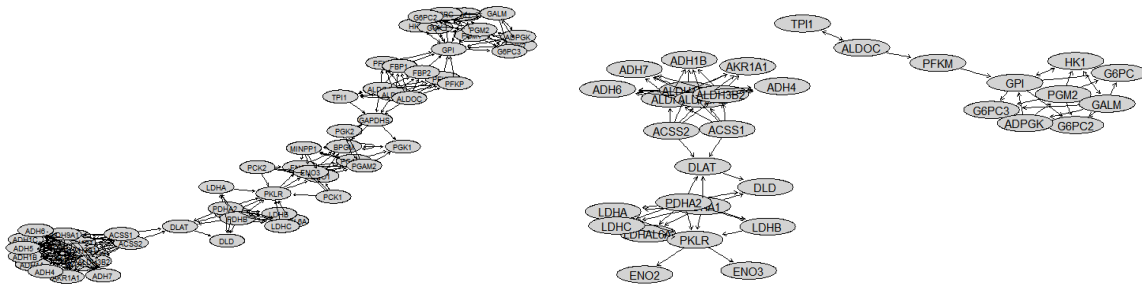

**Figure S1:** The network connectivity plots of the 62 genes (left) and the top selected genes (right) for pathway *hsa00010*.

### **Citrate cycle (TCA cycle) (*hsa00020*)**

There are total 30 genes in this pathway and all were mapped to this dataset. Table S2 lists the top selected genes which passed the 60% stability selection rate by using any one of the three methods (IVHC, IV and EN). Overall, the top genes have higher selection rate using IVGC than the other two methods. The prediction errors of the IVGC, IV and EN are 0.4896, 0.5134 and 0.5040, respectively, indicating good performance of IVGC in selecting important genes in this pathway.

**Table S2:** List of top selected genes with a stability selection rate >60% by using any one of the three methods (IVGC, IV and EN) for pathway *hsa00020*.

| Gene Symbol | IVGC | IV   | EN   |
|-------------|------|------|------|
| FH          | 1.00 | 0.92 | 1.00 |
| PDHA1       | 0.99 | 0.90 | 0.97 |
| MDH2        | 0.95 | 0.66 | 0.90 |
| CS          | 0.95 | 0.51 | 0.69 |
| PDHA2       | 0.93 | 0.47 | 0.73 |
| PC          | 0.92 | 0.61 | 0.85 |
| ACO1        | 0.91 | 0.51 | 0.79 |
| IDH2        | 0.91 | 0.43 | 0.65 |
| PCK1        | 0.82 | 0.11 | 0.26 |
| SUCLG1      | 0.77 | 0.33 | 0.56 |
| PCK2        | 0.77 | 0.04 | 0.07 |
| ACLY        | 0.74 | 0.04 | 0.10 |
| SDHC        | 0.70 | 0.01 | 0.05 |

|       |      |      |      |
|-------|------|------|------|
| DLAT  | 0.68 | 0.36 | 0.52 |
| DLST  | 0.68 | 0.10 | 0.34 |
| IDH3G | 0.64 | 0.03 | 0.10 |
| IDH1  | 0.62 | 0.04 | 0.15 |
| PDHB  | 0.62 | 0.03 | 0.13 |

Figure S2 shows the network connectivity information of the 30 genes and the top selected genes listed in Table S2. Given the tight connection information among the genes, it is not surprising to see the improved prediction performance of the IVGC method compared to others.

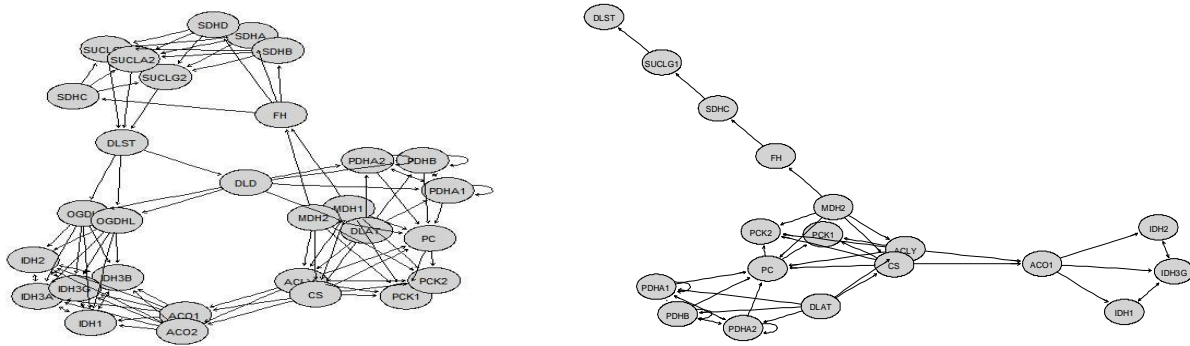

**Figure S2:** The network connectivity plots of the 30 genes (left) and the top selected genes (right) for pathway *hsa00020*.

### ***Pentose phosphate pathway (hsa00030)***

There are total 30 genes in this pathway, among which 28 were mapped to this dataset. So we focused the analysis on the 28 genes. Table S3 lists the top selected genes which passed the 60% stability selection rate by using any one of the three methods (IVHC, IV and EN). The prediction errors of the IVGC, IV and EN are 0.5410, 0.5388 and 0.5373, respectively. For this pathway, IVGC has slightly larger prediction error than the other two methods.

**Table S3:** List of top selected genes with a stability selection rate >60% by using any one of the three methods (IVGC, IV and EN) for pathway *hsa00030*.

| <b>Gene Symbol</b> | <b>IVGC</b> | <b>IV</b> | <b>EN</b> |
|--------------------|-------------|-----------|-----------|
| ALDOC              | 0.81        | 0.75      | 0.97      |
| PFKM               | 0.81        | 0.72      | 0.96      |
| GLYCTK             | 0.72        | 0.6       | 0.89      |
| TKT                | 0.68        | 0.6       | 0.84      |
| RBKS               | 0.47        | 0.35      | 0.62      |
| PRPS2              | 0.46        | 0.41      | 0.77      |

Figure S3 shows the network connectivity information of the 28 genes and the top selected genes listed in Table S3. The connectivity information among the 6 genes are relatively high. Although IVGC has larger prediction error, the difference not very significant among the three. For this pathway, EN method gives higher selection rate for most genes compared to IVGC and IV.

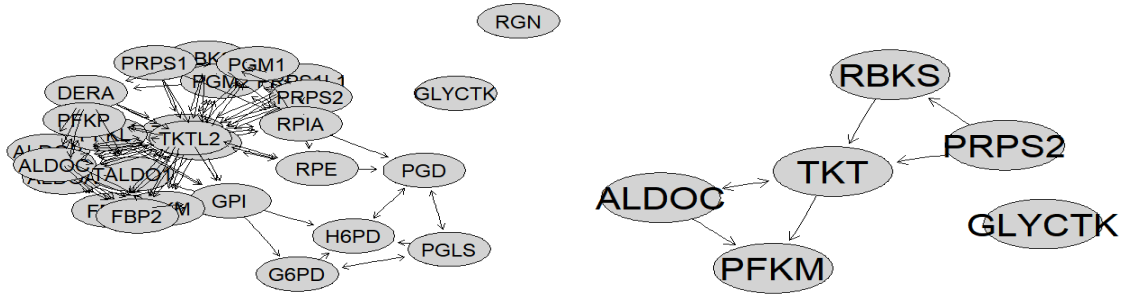

**Figure S3:** The network connectivity plots of the 28 genes (left) and the top selected genes (right) for pathway *hsa00030*.

***Pentose and glucuronate interconversions (hsa00040)***

There are total 34 genes in this pathway, among which 31 were mapped to the dataset. So we focused the analysis on the 31 genes. Table S4 lists the top selected genes. The prediction errors for IVGC, IV and EN are 0.5165, 0.5148 and 0.5159, respectively. The network connectivity information are shown in Fig. S4. From the figure, the top selected genes have no direct connection in this pathway. Thus, it is not surprising to see the similar prediction error of the three methods.

**Table S4:** List of top selected genes with a stability selection rate >60% by using any one of the three methods (IVGC, IV and EN) for pathway *hsa00040*.

| Gene Symbol | IVGC | IV   | EN   |
|-------------|------|------|------|
| UGT1A1      | 0.81 | 0.85 | 0.92 |
| AKR1B1      | 0.78 | 0.83 | 0.91 |
| UGT1A9      | 0.64 | 0.58 | 0.82 |

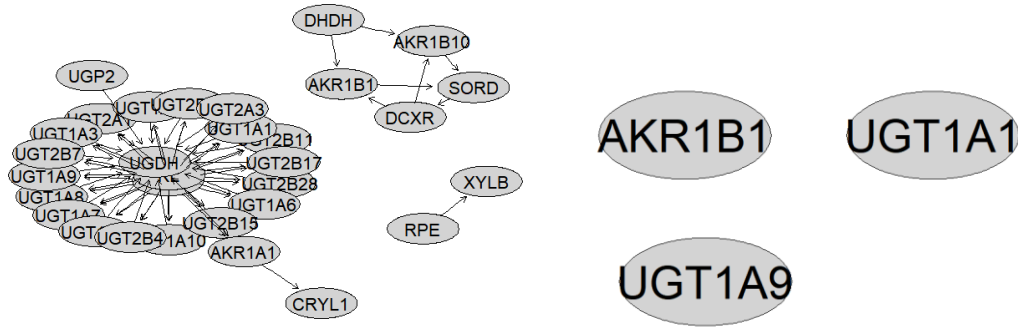

**Figure S4:** The network connectivity plots of the 28 genes (left) and the top selected genes (right) for pathway *hsa00040*.

***Galactose metabolism (hsa00052)***

There are total 31 genes in this pathway, among which 29 were mapped to this dataset. So we focused the analysis on the 29 genes. Table S5 lists the top selected genes which passed the 60% stability selection rate by using any one of the three methods (IVGC, IV and EN). The prediction errors of the IVGC, IV and EN are 0.5210, 0.5695 and 0.5357, respectively, indicating good performance of IVGC in selecting important genes in this pathway.

**Table S5:** List of top selected genes with a stability selection rate >60% by using any one of the three methods (IVGC, IV and EN) for pathway *hsa00052*.

| Gene Symbol | IVGC | IV   | EN   |
|-------------|------|------|------|
| PFKM        | 0.75 | 0.56 | 0.89 |

|         |      |      |      |
|---------|------|------|------|
| GALM    | 0.74 | 0.51 | 0.82 |
| GLB1    | 0.7  | 0.47 | 0.79 |
| GALK1   | 0.67 | 0.36 | 0.61 |
| B4GALT2 | 0.66 | 0.53 | 0.82 |
| LCT     | 0.66 | 0.34 | 0.65 |
| PGM2    | 0.4  | 0.33 | 0.64 |
| AKR1B1  | 0.31 | 0.47 | 0.83 |
| GALT    | 0.23 | 0.32 | 0.61 |

Figure S5 shows the network connectivity information of the 29 genes and the top selected genes listed in Table S5. Although IVGC has the smallest prediction error among the three methods, it does not give high selection rate for the listed genes compared to EN.

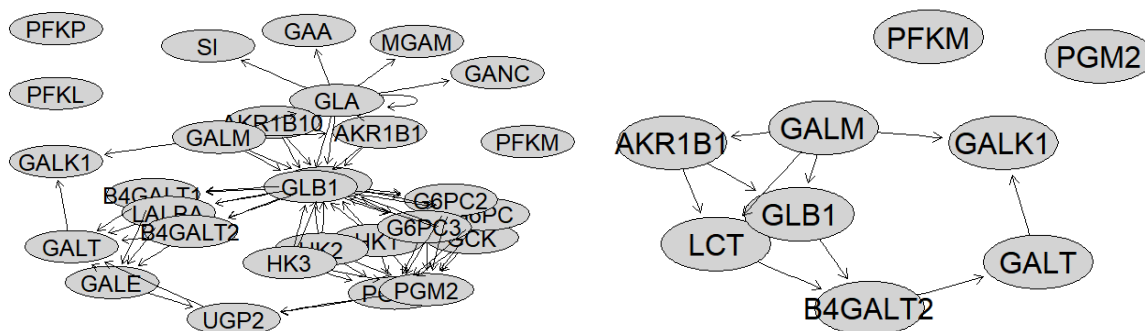

**Figure S5:** The network connectivity plots of the 29 genes (left) and the top selected genes (right) for pathway *hsa00052*.

## Energy Metabolism

**hsa00190** [ [xml](#) | [html](#) | [graphics](#) ] Oxidative phosphorylation

**hsa00910** [ [xml](#) | [html](#) | [graphics](#) ] Nitrogen metabolism

**hsa00920** [ [xml](#) | [html](#) | [graphics](#) ] Sulfur metabolism

### **Oxidative phosphorylation (hsa00190)**

There are total 133 genes in this pathway, among which 97 were mapped to the dataset. So we focused the analysis on the 97 genes. The prediction errors of the three methods are 0.5439 0.5582 0.5470, corresponding to method IVGC, IV and EN, respectively. There is only one gene with a selection rate >60% by using EN method. Both IVGC and IV has low selection rate. By checking the gene connectivity information (Fig. S6), they are quite loose.

**Table S6:** List of top selected genes with a stability selection rate >60% by using any one of the three methods (IVGC, IV and EN) for pathway *hsa00190*.

| Gene Symbol | IVGC | IV   | EN   |
|-------------|------|------|------|
| COX7A1      | 0.3  | 0.38 | 0.66 |

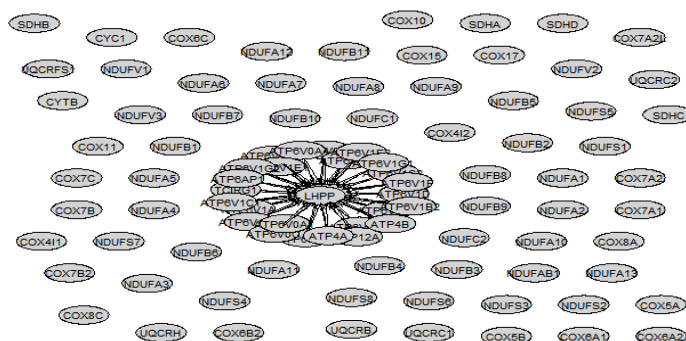

**Figure S6:** The network connectivity plots of the 97 analyzed genes in pathway *hsa00190*.

***Nitrogen metabolism(hsa00910)***

There are total 17 genes in this pathway and all were mapped to the dataset. So we focused the analysis on the 17 genes. The prediction errors of the three methods are 0.5411, 0.5359 and 0.5319, respectively corresponding to IVGC, IV and EN. Again, the gene connectivity information shown in Fig. S7 is quite loose.

**Table S7:** List of top selected genes with a stability selection rate >60% by using any one of the three methods (IVGC, IV and EN) for pathway *hsa00910*.

| Gene Symbol | IVGC | IV   | EN  |
|-------------|------|------|-----|
| GLUD1       | 0.4  | 0.41 | 0.7 |

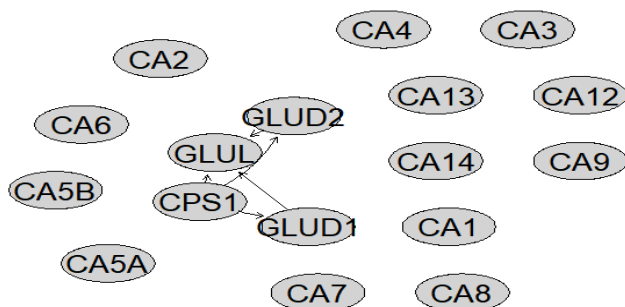

**Figure S7:** The network connectivity plots of the 17 analyzed genes in pathway *hsa00910*.

***Sulfur metabolism(hsa00920)***

There are total 9 genes in this pathway, among which 7 were mapped to the dataset. So we focused the analysis on the 7 genes. The prediction errors of the three methods are 0.5404, 0.5333 and 0.5302. IVGC does not show improved prediction performance for this pathway.

**Table S8:** List of top selected genes with a stability selection rate >60% by using any one of the three methods (IVGC, IV and EN) for pathway *hsa00920*.

| Gene Symbol | IVGC | IV   | EN   |
|-------------|------|------|------|
| SUOX        | 0.86 | 0.82 | 0.98 |
| MPST        | 0.59 | 0.49 | 0.73 |
| TST         | 0.54 | 0.35 | 0.64 |
| PAPSS1      | 0.48 | 0.41 | 0.66 |

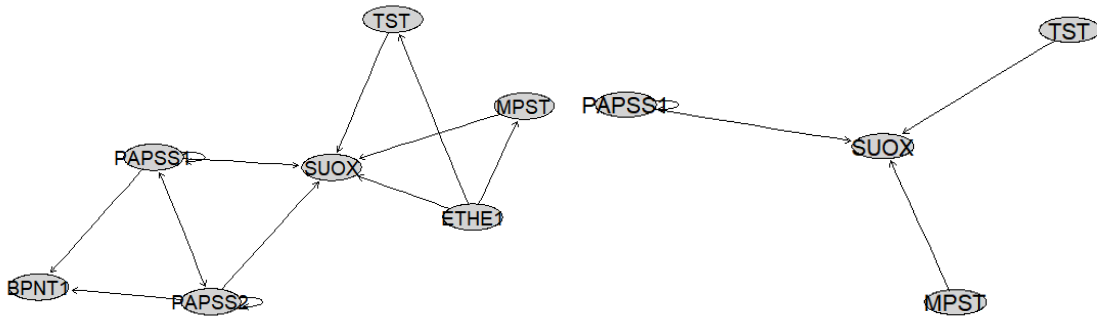

**Figure S8:** The network connectivity plots of the 7 genes (left) and the top selected genes (right) for pathway *hsa00920*.

## Lipid Metabolism

- [hsa00061](#) [ [xml](#) | [html](#) | [graphics](#) ] Fatty acid biosynthesis
- [hsa00062](#) [ [xml](#) | [html](#) | [graphics](#) ] Fatty acid elongation in mitochondria
- [hsa00071](#) [ [xml](#) | [html](#) | [graphics](#) ] Fatty acid metabolism
- [hsa00072](#) [ [xml](#) | [html](#) | [graphics](#) ] Synthesis and degradation of ketone bodies
- [hsa00100](#) [ [xml](#) | [html](#) | [graphics](#) ] Biosynthesis of steroids

### *Fatty acid biosynthesis (hsa00061)*

There are total 13 genes in this pathway, among which 9 were mapped to the dataset. So we focused the analysis on the 9 genes. The prediction errors of the three methods are 0.5395, 0.5331 and 0.5395. There is only one gene passed the 60% selection threshold by EN method.

**Table S9:** List of top selected genes with a stability selection rate >60% by using any one of the three methods (IVGC, IV and EN) for pathway *hsa00061*.

| Gene Symbol | IVGC | IV   | EN   |
|-------------|------|------|------|
| ACACB       | 0.44 | 0.37 | 0.74 |

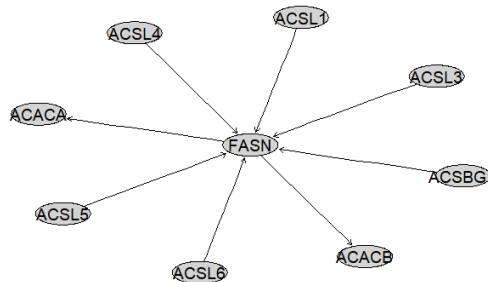

**Figure S9:** The network connectivity plots of the 9 analyzed genes in pathway *hsa00061*.

### *Fatty acid elongation in mitochondria (hsa00062)*

There are total 30 genes in this pathway, among which 16 were mapped to the expression data. So we focused the analysis on the 16 genes. The prediction errors for IVGC, IV and EN are 0.5088, 0.5065 and 0.5120, respectively. For this pathway, IV has the smallest prediction error among the three, although the difference is not very significant. The connectivity plot in Fig. S10 shows that the top selected genes have no direct connection.



**Table S10:** List of top selected genes with a stability selection rate >60% by using any one of the three methods (IVGC, IV and EN) for pathway *hsa00062*.

| Gene Symbol | IVGC | IV   | EN   |
|-------------|------|------|------|
| ELOVL6      | 0.94 | 0.97 | 0.99 |
| ELOVL3      | 0.94 | 0.96 | 0.99 |
| ACAA2       | 0.87 | 0.86 | 0.91 |
| ELOVL7      | 0.71 | 0.71 | 0.78 |

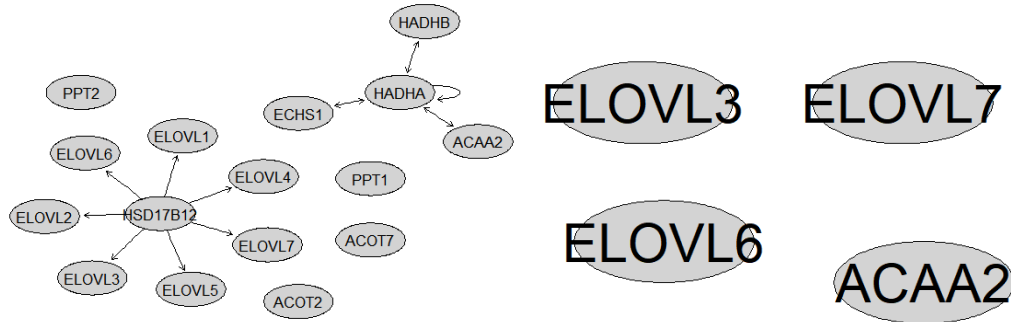

**Figure S10:** The network connectivity plots of the 16 genes (left) and the top selected genes (right) for pathway *hsa00062*.

**Fatty acid metabolism (*hsa00071*)**

There are total 44 genes in this pathway, among which 39 were mapped to the expression data. So we focused the analysis on the 39 genes. The prediction errors for IVGC, IV and EN are 0.4831, 0.4834 and 0.4874, respectively. The connectivity plot in Fig. S11 shows that the top selected genes have no direct connection.

**Table S11:** List of top selected genes with a stability selection rate >60% by using any one of the three methods (IVGC, IV and EN) for pathway *hsa00071*.

| Gene Symbol | IVGC | IV   | EN   |
|-------------|------|------|------|
| ACAT2       | 1    | 1    | 1    |
| CPT1A       | 0.85 | 0.87 | 0.94 |
| ALDH1B1     | 0.56 | 0.58 | 0.75 |

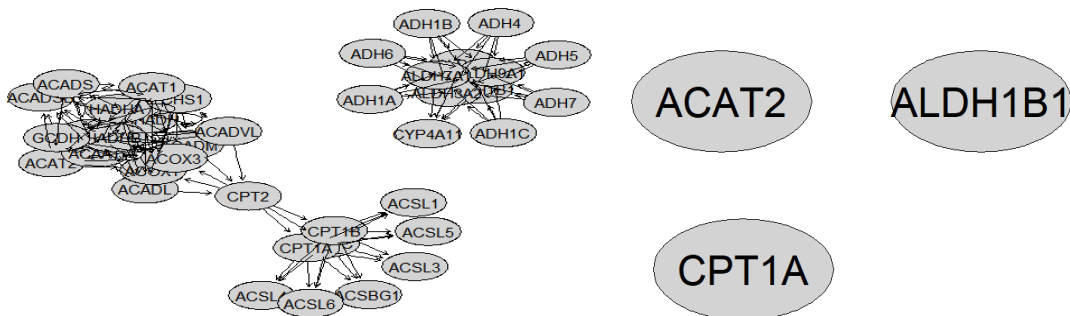

**Figure S11:** The network connectivity plots of the 39 genes (left) and the top selected genes (right) for pathway *hsa00071*.

**Synthesis and degradation of ketone bodies (hsa00072)**

There are total 10 genes in this pathway, among which 7 were mapped to the expression data. So we focused the analysis on the 7 genes. The prediction error for the three methods are 0.4801 0.4759 0.4805, respectively. There is only one gene passed the 60% selection threshold.

**Table S12:** List of top selected genes with a stability selection rate >60% by using any one of the three methods (IVGC, IV and EN) for pathway *hsa00072*.

| Gene symbol | IVGC | IV | EN |
|-------------|------|----|----|
| ACAT2       | 1    | 1  | 1  |

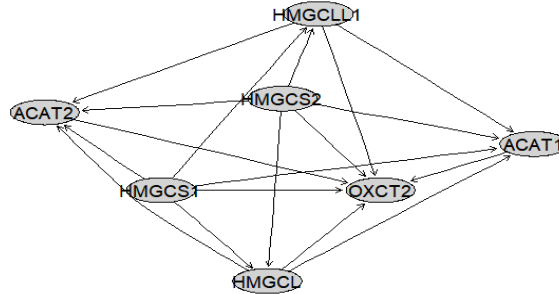

**Figure S12:** The network connectivity plots of the 7 analyzed genes in pathway *hsa00072*.

**Biosynthesis of steroids(hsa00100)**

There are total 19 genes in this pathway, among which 16 were mapped to the expression data. So we focused the analysis on the 16 genes. The prediction errors for the three methods are 0.4946, 0.4891 and 0.4932, respectively.

**Table S13:** List of top selected genes with a stability selection rate >60% by using any one of the three methods (IVGC, IV and EN) for pathway *hsa00100*.

| Gene Symbol | IVGC | IV   | EN   |
|-------------|------|------|------|
| FDFT1       | 1    | 1    | 1    |
| DHCR24      | 1    | 0.96 | 0.97 |
| EBP         | 0.96 | 0.92 | 0.96 |
| TM7SF2      | 0.82 | 0.43 | 0.66 |
| SQLE        | 0.75 | 0.15 | 0.36 |
| LSS         | 0.68 | 0.13 | 0.35 |
| CYP51A1     | 0.6  | 0.03 | 0.1  |

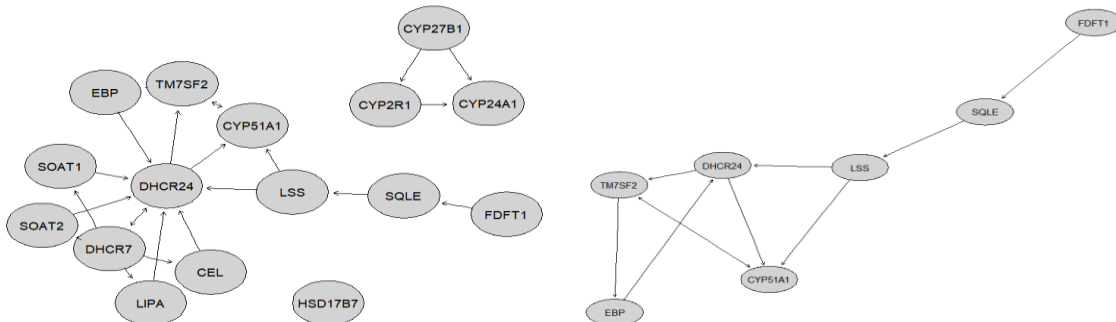

**Figure S13:** The network connectivity plots of the 16 genes (left) and the top selected genes (right) for pathway *hsa00100*.

## Nucleotide Metabolism

**hsa00240** [ [xml](#) | [html](#) | [graphics](#) ] Pyrimidine metabolism

There are total 101 genes in this pathway, among which 80 were mapped to the expression data. So we focused the analysis on the 80 genes. The prediction error for the three methods are 0.5145, 0.5093 and 0.5108, respectively. For this pathway, IV has the smallest prediction error, although the difference is not very significant. The selection rates for the three methods are quite similar, indicating similar performance of the three methods. Network connectivity plot shows that the connectivity is quite loose among the top selected genes.

**Table S14:** List of top selected genes with a stability selection rate >60% by using any one of the three methods (IVGC, IV and EN) for pathway *hsa00240*.

| Gene Symbol | IVGC | IV   | EN   |
|-------------|------|------|------|
| DCTD        | 0.96 | 0.96 | 0.99 |
| ENPP1       | 0.91 | 0.91 | 0.98 |
| ENTPD5      | 0.66 | 0.65 | 0.75 |
| POLE2       | 0.59 | 0.53 | 0.71 |

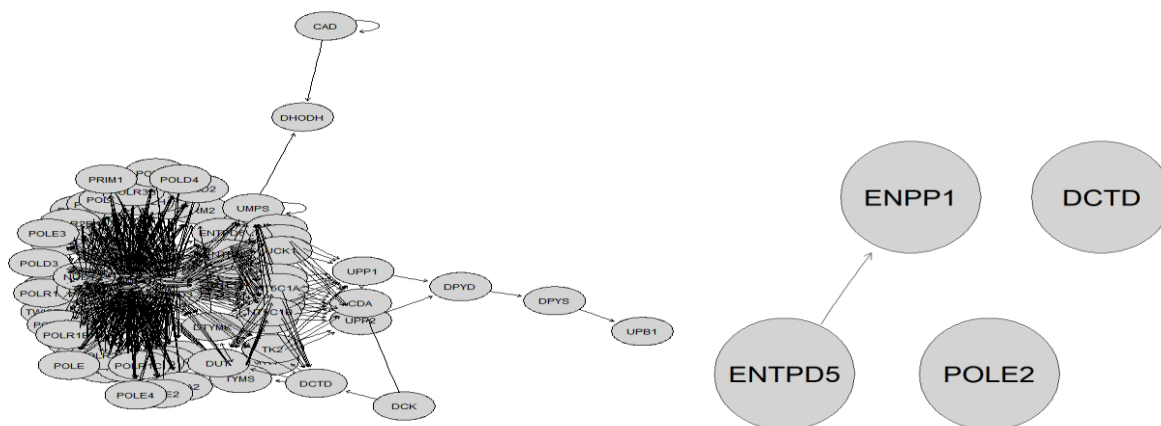

**Figure S14:** The network connectivity plots of the 80 genes (left) and the top selected genes (right) for pathway *hsa00240*.

## Amino Acid Metabolism

**hsa00260** [ [xml](#) | [html](#) | [graphics](#) ] Glycine, serine and threonine metabolism

**hsa00280** [ [xml](#) | [html](#) | [graphics](#) ] Valine, leucine and isoleucine degradation

**hsa00310** [ [xml](#) | [html](#) | [graphics](#) ] Lysine degradation

**hsa00330** [ [xml](#) | [html](#) | [graphics](#) ] Arginine and proline metabolism

**hsa00350** [ [xml](#) | [html](#) | [graphics](#) ] Tyrosine metabolism

### **Glycine, serine and threonine metabolism(hsa00260)**

There are total 40 genes in this pathway, among which 38 were mapped to the expression data. So we focused the analysis on the 38 genes. The prediction error for the three methods are 0.5303, 0.5416 and 0.5339, respectively. For this pathway, the three methods perform quite similarly with IVGC giving smaller prediction error among the three methods.

**Table S15:** List of top selected genes with a stability selection rate >60% by using any one of the three methods (IVGC, IV and EN) for pathway *hsa00260*.

| Gene Symbol | IVGC | IV   | EN   |
|-------------|------|------|------|
| ALAS1       | 0.89 | 0.8  | 0.96 |
| CHDH        | 0.87 | 0.76 | 0.94 |
| SARDH       | 0.78 | 0.72 | 0.87 |
| MAOB        | 0.59 | 0.45 | 0.68 |

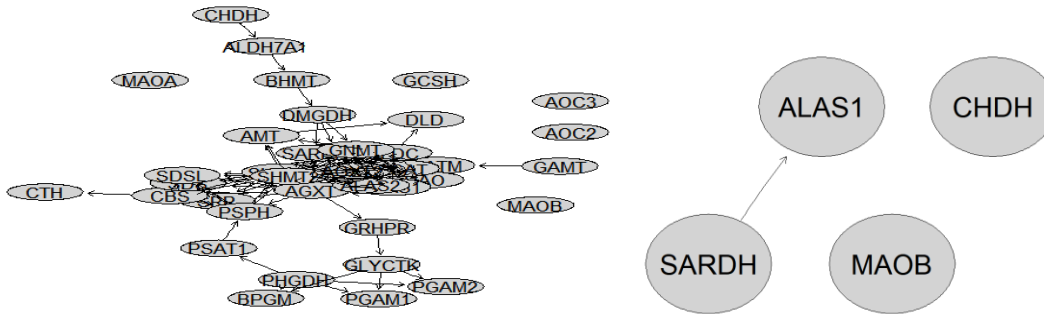

**Figure S15:** The network connectivity plots of the 38 genes (left) and the top selected genes (right) for pathway *hsa00260*.

**Valine, leucine and isoleucine degradation(*hsa00280*)**

There are total 48 genes in this pathway, among which 44 were mapped to the expression data. So we focused the analysis on the 44 genes. The prediction errors for the three methods are 0.4912, 0.4908 and 0.4896, respectively. Again, the selection performance of the three methods is quite similar.

**Table S16:** List of top selected genes with a stability selection rate >60% by using any one of the three methods (IVGC, IV and EN) for pathway *hsa00280*.

| Gene Symbol | IVGC | IV   | EN   |
|-------------|------|------|------|
| ACAT2       | 1    | 0.99 | 1    |
| AOX1        | 0.94 | 0.84 | 0.93 |
| ABAT        | 0.9  | 0.78 | 0.88 |
| ALDH1B1     | 0.62 | 0.47 | 0.62 |

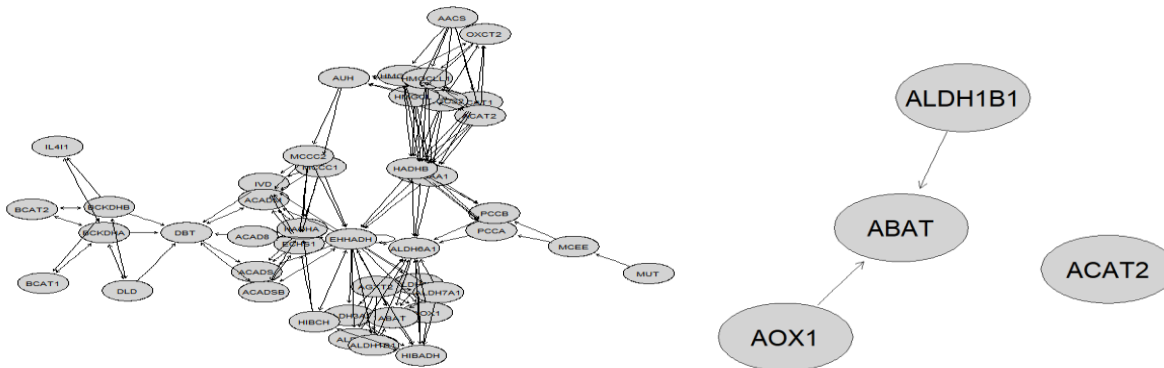

**Figure S16:** The network connectivity plots of the 44 genes (left) and the top selected genes (right) for pathway *hsa00280*.

### Lysine degradation(*hsa00310*)

There are total 59 genes in this pathway, among which 36 were mapped to the expression data. So we focused the analysis on the 36 genes. The prediction errors for the three methods are 0.4874, 0.4939 and 0.5059, respectively. Although the selection rate with IVGC is not as high as EN due to loose connection in the network (Fig. S17), it does have the smallest prediction error among the three.

**Table S17:** List of top selected genes with a stability selection rate >60% by using any one of the three methods (IVGC, IV and EN) for pathway *hsa00310*.

| Gene Symbol | IVGC | IV   | EN   |
|-------------|------|------|------|
| ACAT2       | 1    | 0.99 | 1    |
| PRDM6       | 0.94 | 0.9  | 0.97 |
| PRDM2       | 0.75 | 0.63 | 0.87 |
| DOT1L       | 0.74 | 0.67 | 0.92 |
| AADAT       | 0.67 | 0.61 | 0.83 |
| ALDH1B1     | 0.6  | 0.51 | 0.79 |
| ALDH2       | 0.5  | 0.38 | 0.67 |
| EZH1        | 0.47 | 0.35 | 0.67 |

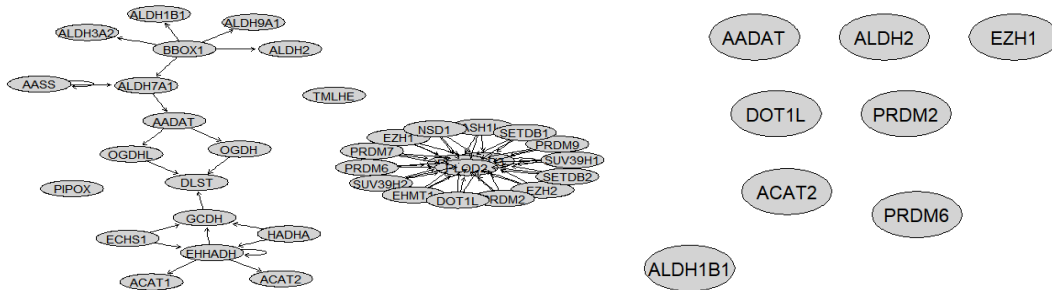

**Figure S17:** The network connectivity plots of the 36 genes (left) and the top selected genes (right) for pathway *hsa00310*.

### Arginine and proline metabolism(*hsa00330*)

There are total 50 genes in this pathway, among which 40 were mapped to the expression data. So we focused the analysis on the 40 genes. The prediction errors for the three methods are 0.5361, 0.5721 and 0.5554, respectively. Overall, IVGC has better selection rate and smaller prediction error than the other two methods.

**Table S18:** List of top selected genes with a stability selection rate >60% by using any one of the three methods (IVGC, IV and EN) for pathway *hsa00330*.

| Gene Symbol | IVGC | IV   | EN   |
|-------------|------|------|------|
| AOX1        | 0.94 | 0.84 | 0.93 |
| ABAT        | 0.9  | 0.78 | 0.88 |
| ALDH2       | 0.81 | 0.45 | 0.78 |
| SMS         | 0.76 | 0.39 | 0.78 |
| MAOB        | 0.76 | 0.39 | 0.62 |
| CKMT2       | 0.76 | 0.34 | 0.77 |
| ALDH4A1     | 0.76 | 0.27 | 0.64 |
| GOT2        | 0.72 | 0.43 | 0.68 |
| ARG1        | 0.68 | 0.28 | 0.66 |
| ALDH3A2     | 0.68 | 0.15 | 0.39 |

|         |      |      |      |
|---------|------|------|------|
| OAT     | 0.67 | 0.17 | 0.45 |
| ALDH1B1 | 0.62 | 0.47 | 0.62 |
| SAT2    | 0.62 | 0.27 | 0.62 |
| GOT1    | 0.6  | 0.21 | 0.57 |

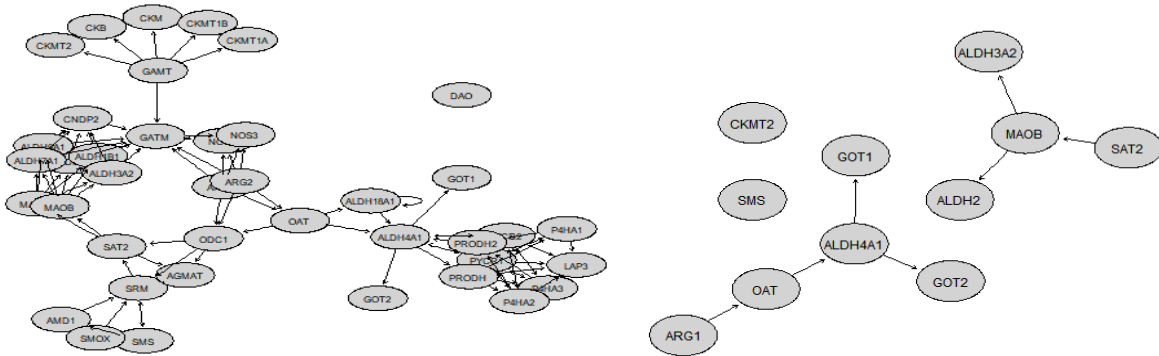

**Figure S18:** The network connectivity plots of the 40 genes (left) and the top selected genes (right) for pathway *hsa00330*.

### Tyrosine metabolism(*hsa00350*)

There are total 36 genes in this pathway, among which 34 were mapped to the expression data. So we focused the analysis on the 34 genes. The prediction errors for the three methods are 0.5051, 0.5271 and 0.5221, respectively. Among the three methods, IVGC has the smallest prediction error and the largest selection rate for nearly all the genes.

**Table S19:** List of top selected genes with a stability selection rate >60% by using any one of the three methods (IVGC, IV and EN) for pathway *hsa00350*.

| Gene Symbol | IVGC | IV   | EN   |
|-------------|------|------|------|
| AOX1        | 0.97 | 0.91 | 0.98 |
| DDC         | 0.9  | 0.53 | 0.73 |
| MAOB        | 0.88 | 0.43 | 0.7  |
| GOT2        | 0.75 | 0.32 | 0.5  |
| GOT1        | 0.74 | 0.36 | 0.63 |
| HGD         | 0.63 | 0.29 | 0.48 |

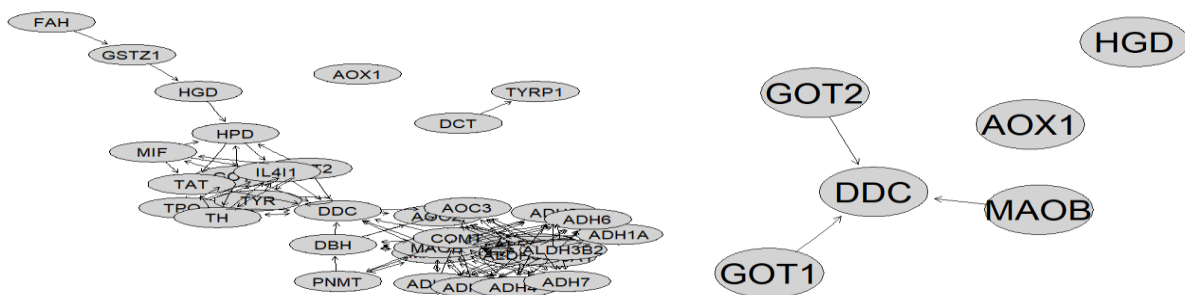

**Figure S19:** The network connectivity plots of the 40 genes (left) and the top selected genes (right) for pathway *hsa00350*.

### Glycan Biosynthesis and Metabolism

[hsa00510](#) [ [xml](#) | [html](#) | [graphics](#) ] N-Glycan biosynthesis

[hsa00512](#) [ [xml](#) | [html](#) | [graphics](#) ] O-Glycan biosynthesis

[hsa00532](#) [ [xml](#) | [html](#) | [graphics](#) ] Chondroitin sulfate biosynthesis

[hsa00531](#) [ [xml](#) | [html](#) | [graphics](#) ] Glycosaminoglycan degradation

### *N-Glycan biosynthesis(hsa00510)*

There are total 49 genes in this pathway, among which 39 were mapped to the expression data. So we focused the analysis on the 39 genes. The prediction errors for the three methods are 0.5459, 0.5393 and 0.5261, respectively.

**Table S20:** List of top selected genes with a stability selection rate >60% by using any one of the three methods (IVGC, IV and EN) for pathway *hsa00510*.

| Gene Symbol | IVGC | IV   | EN   |
|-------------|------|------|------|
| ST6GAL1     | 0.68 | 0.7  | 0.96 |
| MAN1B1      | 0.55 | 0.52 | 0.84 |
| B4GALT2     | 0.53 | 0.49 | 0.79 |
| ALG2        | 0.45 | 0.42 | 0.68 |
| B4GALT3     | 0.41 | 0.37 | 0.61 |

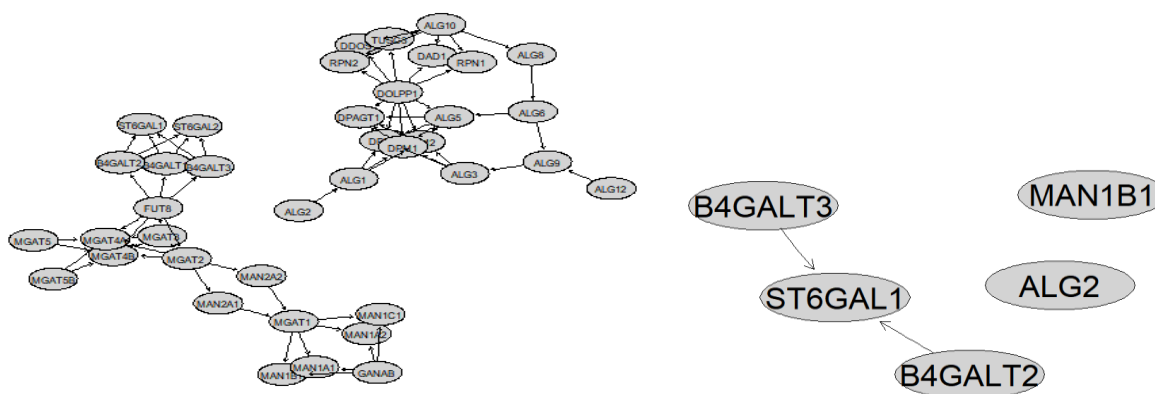

**Figure S20:** The network connectivity plots of the 39 genes (left) and the top selected genes (right) for pathway *hsa00510*.

### *O-Glycan biosynthesis(hsa00512)*

There are total 31 genes in this pathway, among which 24 were mapped to the expression data. So we focused the analysis on the 24 genes. The prediction errors for the three methods are 0.5149, 0.5142 and 0.5145, respectively. The top selected genes have no direct connection (see Fig. S20).

**Table S21:** List of top selected genes with a stability selection rate >60% by using any one of the three methods (IVGC, IV and EN) for pathway *hsa00512*.

| Gene Symbol | IVGC | IV   | EN   |
|-------------|------|------|------|
| GALNT3      | 0.97 | 0.89 | 0.98 |
| GALNT4      | 0.91 | 0.83 | 0.95 |
| GALNT6      | 0.85 | 0.68 | 0.83 |
| GALNT9      | 0.83 | 0.69 | 0.86 |
| GALNT8      | 0.65 | 0.3  | 0.56 |

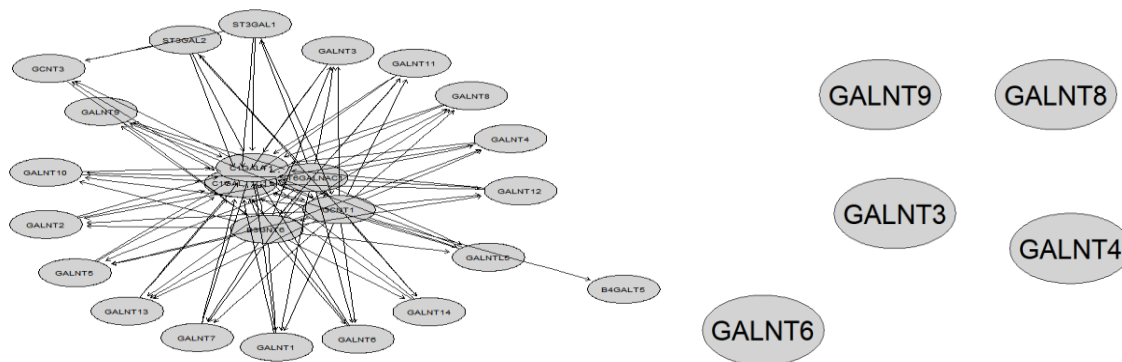

**Figure S21:** The network connectivity plots of the 24 genes (left) and the top selected genes (right) for pathway *hsa00512*.

### **Chondroitin sulfate biosynthesis(*hsa00532*)**

There are total 20 genes in this pathway, among which 13 were mapped to the expression data. So we focused the analysis on the 13 genes. The prediction errors for the three methods are 0.5293, 0.5409 and 0.5377, respectively.

**Table S22:** List of top selected genes with a stability selection rate >60% by using any one of the three methods (IVGC, IV and EN) for pathway *hsa00532*.

| Gene Symbol | IVGC | IV   | EN   |
|-------------|------|------|------|
| CHSY1       | 0.55 | 0.6  | 0.82 |
| CHST3       | 0.54 | 0.53 | 0.8  |
| CHST12      | 0.46 | 0.47 | 0.75 |

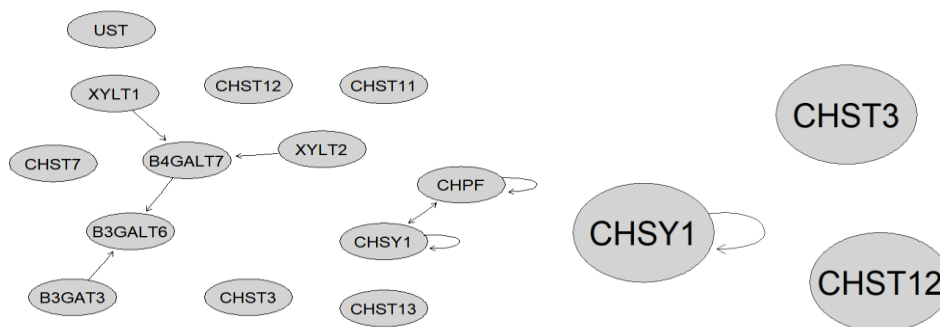

**Figure S22:** The network connectivity plots of the 13 genes (left) and the top selected genes (right) for pathway *hsa00532*.

### **Glycosaminoglycan degradation(*hsa00531*)**

There are total 19 genes in this pathway, among which 18 were mapped to the expression data. So we focused the analysis on the 18 genes. The prediction errors for the three methods are 0.5372, 0.5446 and 0.5373, respectively.

**Table S23:** List of top selected genes with a stability selection rate >60% by using any one of the three methods (IVGC, IV and EN) for pathway *hsa00071*.

| Gene Symbol | IVGC | IV   | EN   |
|-------------|------|------|------|
| GALNS       | 0.75 | 0.48 | 0.79 |
| HYAL1       | 0.62 | 0.39 | 0.63 |
| GLB1        | 0.24 | 0.39 | 0.66 |



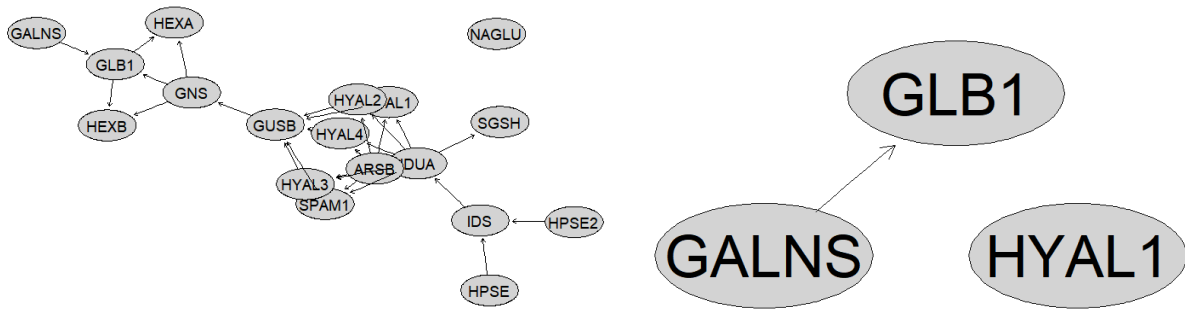

**Figure S23:** The network connectivity plots of the 18 genes (left) and the top selected genes (right) for pathway *hsa00531*.

## Metabolism of Cofactors and Vitamins

- hsa00730** [ [xml](#) | [html](#) | [graphics](#) ] Thiamine metabolism
- hsa00740** [ [xml](#) | [html](#) | [graphics](#) ] Riboflavin metabolism
- hsa00750** [ [xml](#) | [html](#) | [graphics](#) ] Vitamin B6 metabolism
- hsa00760** [ [xml](#) | [html](#) | [graphics](#) ] Nicotinate and nicotinamide metabolism
- hsa00770** [ [xml](#) | [html](#) | [graphics](#) ] Pantothenate and CoA biosynthesis

### *Thiamine metabolism(hsa00730)*

There are total 16 genes in this pathway, among which 13 were mapped to the expression data. So we focused the analysis on the 13 genes. No genes have selection rate larger than 60% in this pathway.

### *Riboflavin metabolism(hsa00740)*

There are total 8 genes in this pathway, among which 6 were mapped to the expression data. So we focused the analysis on the 6 genes. The prediction errors for the three methods are 0.5159, 0.5374 and 0.5119, respectively. For this pathway, IVGC and EN perform very similarly.

**Table S24:** List of top selected genes with a stability selection rate >60% by using any one of the three methods (IVGC, IV and EN) for pathway *hsa00740*.

| Gene Symbol | IVGC | IV   | EN   |
|-------------|------|------|------|
| ENPP1       | 0.99 | 0.96 | 1    |
| BLVRB       | 0.9  | 0.75 | 0.92 |
| ACP2        | 0.85 | 0.52 | 0.8  |
| ACP5        | 0.84 | 0.49 | 0.75 |
| ACP1        | 0.67 | 0.56 | 0.81 |
| ENPP3       | 0.49 | 0.35 | 0.63 |

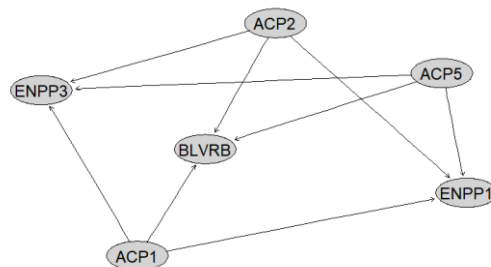

**Figure S24:** The network connectivity plots of the 6 genes in pathway *hsa00740*.

### Vitamin B6 metabolism(*hsa00750*)

There are total 6 genes in this pathway, among which 6 were mapped to the expression data. So we focused the analysis on the 6 genes. The prediction errors for the three methods are 0.4979, 0.4983 and 0.5000, respectively.

**Table S25:** List of top selected genes with a stability selection rate >60% by using any one of the three methods (IVGC, IV and EN) for pathway *hsa00750*.

| Gene Symbol | IVGC | IV   | EN   |
|-------------|------|------|------|
| AOX1        | 0.99 | 1    | 1    |
| PHOSPHO2    | 0.96 | 0.99 | 1    |
| PDXK        | 0.67 | 0.63 | 0.78 |
| PNPO        | 0.65 | 0.59 | 0.83 |

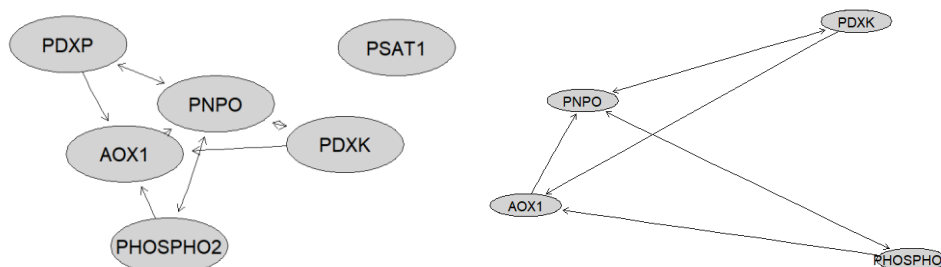

**Figure S25:** The network connectivity plots of the 6 genes (left) and the top selected genes (right) for pathway *hsa00750*.

### Nicotinate and nicotinamide metabolism(*hsa00760*)

There are total 30 genes in this pathway, among which 20 were mapped to the expression data. So we focused the analysis on the 20 genes. The prediction errors for the three methods are 0.4996, 0.4976 and 0.5011, respectively.

**Table S26:** List of top selected genes with a stability selection rate >60% by using any one of the three methods (IVGC, IV and EN) for pathway *hsa00760*.

| Gene Symbol | IVGC | IV   | EN   |
|-------------|------|------|------|
| AOX1        | 0.99 | 0.96 | 0.99 |
| NADK        | 0.97 | 0.85 | 0.94 |
| QPR1        | 0.96 | 0.85 | 0.92 |
| ENPP1       | 0.94 | 0.69 | 0.85 |

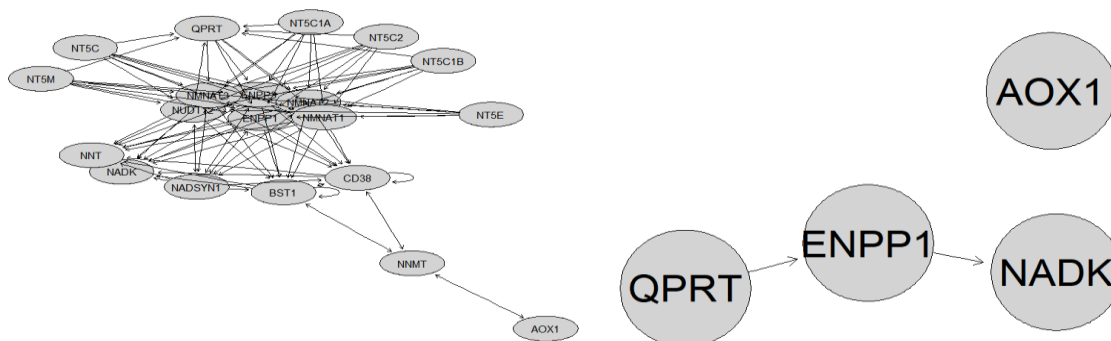

**Figure S26:** The network connectivity plots of the 20 genes (left) and the top selected genes (right) for pathway *hsa00760*.

**Pantothenate and CoA biosynthesis(*hsa00770*)**

There are total 19 genes in this pathway and all were mapped to the expression data. So we focused the analysis on the 19 genes. The prediction errors for the three methods are 0.5105, 0.5108 and 0.5129, respectively.

**Table S27:** List of top selected genes with a stability selection rate >60% by using any one of the three methods (IVGC, IV and EN) for pathway *hsa00770*.

| Gene Symbol | IVGC | IV   | EN   |
|-------------|------|------|------|
| ENPP1       | 0.93 | 0.92 | 0.99 |
| GADL1       | 0.85 | 0.83 | 0.93 |
| COASY       | 0.85 | 0.81 | 0.94 |
| DPYS        | 0.69 | 0.62 | 0.76 |
| PPCDC       | 0.68 | 0.81 | 0.92 |
| BCAT1       | 0.55 | 0.49 | 0.67 |

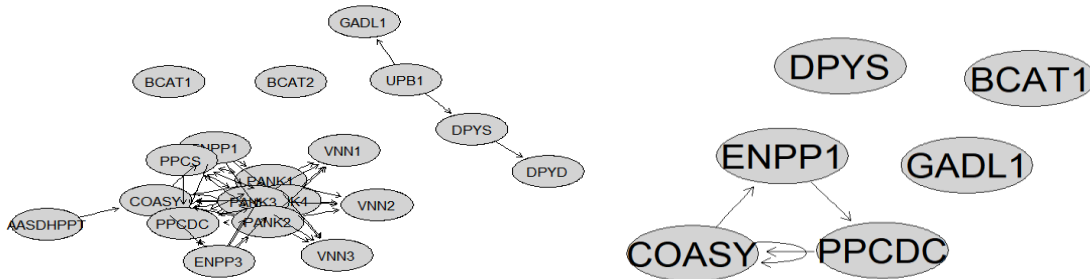

**Figure S27:** The network connectivity plots of the 19 genes (left) and the top selected genes (right) for pathway *hsa00770*.

**Biosynthesis of Secondary Metabolites**

**hsa00900** [ [xml](#) | [html](#) | [graphics](#) ] Terpenoid biosynthesis

There are total 22 genes in this pathway, among which 19 were mapped to the expression data. So we focused the analysis on the 19 genes. The prediction errors for the three methods are 0.4912, 0.4774 and 0.4794, respectively. Although the selection rate for the top genes is quite high for IVGC, its prediction error is quite low compared to IV and EN.

**Table S28:** List of top selected genes with a stability selection rate >60% by using any one of the three methods (IVGC, IV and EN) for pathway *hsa00900*.

| Gene Symbol | IVGC | IV   | EN   |
|-------------|------|------|------|
| ACAT2       | 1    | 1    | 1    |
| HMGCS1      | 0.74 | 0.01 | 0.09 |
| HMGCS2      | 0.69 | 0.09 | 0.15 |
| HMGCR       | 0.67 | 0.13 | 0.23 |

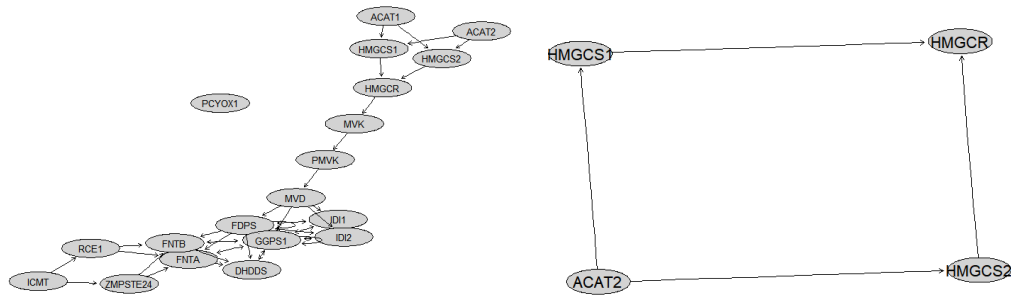

**Figure S28:** The network connectivity plots of the 19 genes (left) and the top selected genes (right) for pathway *hsa00900*.

## Sorting and Degradation

**hsa04130** [ [xml](#) | [html](#) | [graphics](#) ] SNARE interactions in vesicular transport

**hsa04140** [ [xml](#) | [html](#) | [graphics](#) ] Regulation of autophagy

**hsa04120** [ [xml](#) | [html](#) | [graphics](#) ] Ubiquitin mediated proteolysis

### *SNARE interactions in vesicular transport(hsa04130)*

There are total 34 genes in this pathway, among which 25 were mapped to the expression data. So we focused the analysis on the 25 genes. The prediction errors for the three methods are 0.5385, 0.5473 and 0.5298, respectively. The relatively higher prediction error may be explained by the low connectivity between genes (see Fig. S29).

**Table S29:** List of top selected genes with a stability selection rate >60% by using any one of the three methods (IVGC, IV and EN) for pathway *hsa04130*.

| Gene Symbol | IVGC | IV   | EN   |
|-------------|------|------|------|
| YKT6        | 0.61 | 0.55 | 0.81 |
| STX11       | 0.54 | 0.49 | 0.77 |
| BET1        | 0.52 | 0.52 | 0.82 |
| STX1A       | 0.49 | 0.4  | 0.68 |
| STX10       | 0.39 | 0.36 | 0.62 |

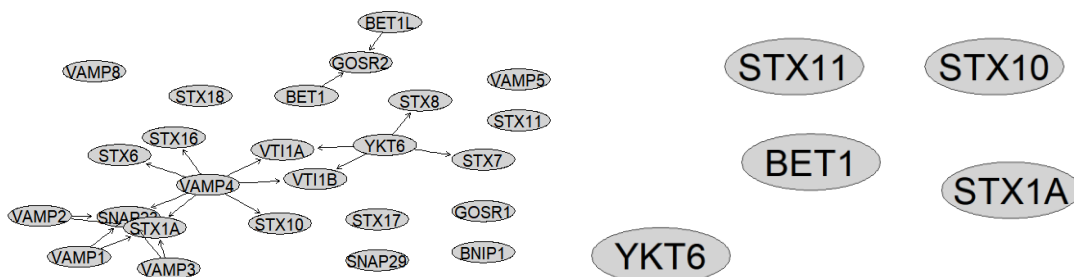

**Figure S29:** The network connectivity plots of the 25 genes (left) and the top selected genes (right) for pathway *hsa04130*.

### *Regulation of autophagy(hsa04140)*

There are total 128 genes in this pathway, among which 107 were mapped to the expression data. So we focused the analysis on the 107 genes. The prediction errors for the three methods are 0.5548, 0.5420 and 0.5546, respectively. Again, the relatively large prediction error may be explained by the low connectivity between top contributing genes (see Fig. S30).

**Table S30:** List of top selected genes with a stability selection rate >60% by using any one of the three methods (IVGC, IV and EN) for pathway *hsa04140*

| Gene Symbol | IVGC | IV   | EN   |
|-------------|------|------|------|
| AKT1S1      | 0.45 | 0.3  | 0.65 |
| MTMR4       | 0.43 | 0.25 | 0.64 |
| RAB33B      | 0.39 | 0.26 | 0.62 |

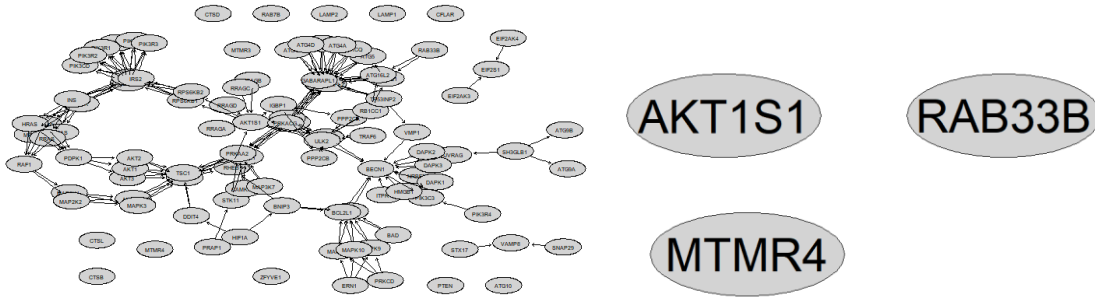

**Figure S30:** The network connectivity plots of the 107 genes (left) and the top selected genes (right) for pathway *hsa04140*.

### Ubiquitin mediated proteolysis(*hsa04120*)

There are total 137 genes in this pathway, among which 112 were mapped to the expression data. So we focused the analysis on the 112 genes. The prediction errors for the three methods are 0.5343, 0.5409 and 0.5577, respectively. Only EN has genes with selection rate larger than 60%. The prediction error of IVGC and IV is quite similar. Since there is no direct connection between genes (Fig. S31), IVGC and IV should perform similar.

**Table S31:** List of top selected genes with a stability selection rate >60% by using any one of the three methods (IVGC, IV and EN) for pathway *hsa04120*.

| Gene Symbol | IVGC | IV   | EN   |
|-------------|------|------|------|
| ITCH        | 0.5  | 0.56 | 0.83 |
| CBL         | 0.33 | 0.39 | 0.63 |

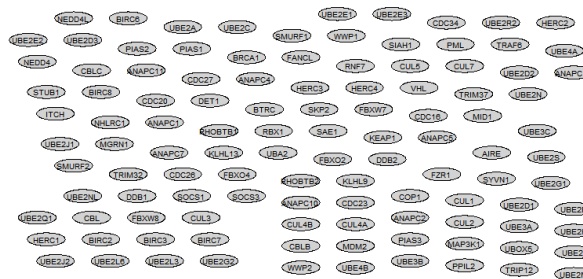

**Figure S31:** The network connectivity plots of the 112 genes in pathway *hsa04120*.

## Signal Transduction

- [hsa04010](#) [ [xml](#) | [html](#) | [graphics](#) ] MAPK signaling pathway
- [hsa04310](#) [ [xml](#) | [html](#) | [graphics](#) ] Wnt signaling pathway
- [hsa04350](#) [ [xml](#) | [html](#) | [graphics](#) ] TGF-beta signaling pathway
- [hsa04370](#) [ [xml](#) | [html](#) | [graphics](#) ] VEGF signaling pathway
- [hsa04630](#) [ [xml](#) | [html](#) | [graphics](#) ] Jak-STAT signaling pathway

### MAPK signaling pathway (*hsa04010*)

There are total 265 genes in this pathway, among which 251 were mapped to the expression data. So we focused the analysis on the 251 genes. The prediction errors of the three methods are 0.5563, 0.5562 and 0.5272, respectively. IVGC has relatively larger prediction error than other two methods, due to loose connectivity between top contributing genes (see Fig. S32).

**Table S32:** List of top selected genes with a stability selection rate >60% by using any one of the three methods (IVGC, IV and EN) for pathway *hsa04010*.

| Gene Symbol | IVGC | IV   | EN   |
|-------------|------|------|------|
| FLNA        | 0.65 | 0.44 | 0.86 |
| TGFB2       | 0.6  | 0.44 | 0.72 |
| CACNA1D     | 0.58 | 0.37 | 0.81 |
| FGFR2       | 0.56 | 0.39 | 0.7  |
| ACVR1C      | 0.52 | 0.35 | 0.72 |
| FOS         | 0.49 | 0.37 | 0.75 |
| FGFR4       | 0.48 | 0.31 | 0.65 |

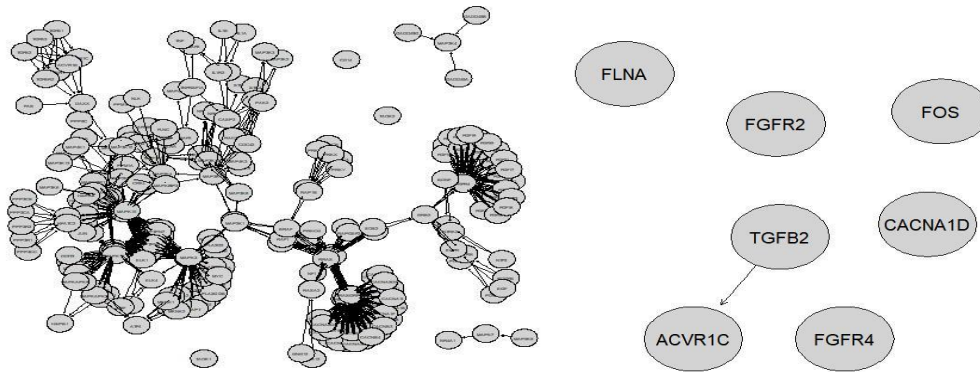

**Figure S32:** The network connectivity plots of the 251 genes (left) and the top selected genes (right) for pathway *hsa04140*.

### TGF-beta signaling pathway (*hsa04350*)

There are total 89 genes in this pathway, among which 85 were mapped to the expression data. So we focused the analysis on the 85 genes. The prediction errors of the three methods are 0.5403, 0.5228 and 0.5403, respectively. For this pathway, IV has smaller prediction error, but has quite low selection rate for genes listed in Table S33.

**Table S33:** List of top selected genes with a stability selection rate >60% by using any one of the three methods (IVGC, IV and EN) for pathway *hsa04350*.

| Gene Symbol | IVGC | IV   | EN   |
|-------------|------|------|------|
| ID4         | 0.94 | 0.86 | 1.00 |
| ACVR1C      | 0.83 | 0.58 | 0.88 |
| THBS1       | 0.78 | 0.56 | 0.71 |
| ID3         | 0.78 | 0.50 | 0.82 |
| TGFB2       | 0.68 | 0.34 | 0.62 |
| THBS4       | 0.57 | 0.34 | 0.71 |
| SMAD1       | 0.42 | 0.34 | 0.61 |

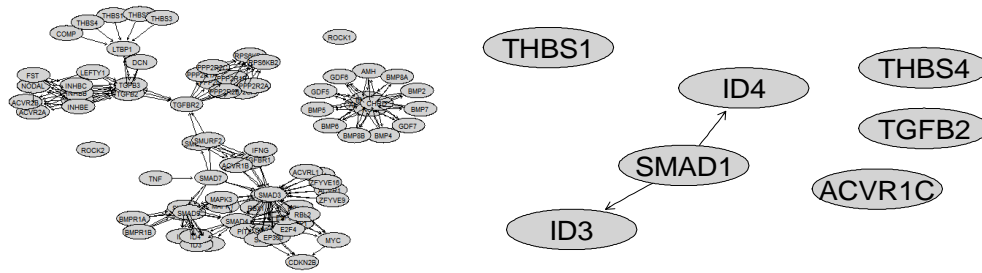

**Figure S33:** The network connectivity plots of the 85 genes (left) and the top selected genes (right) for pathway *hsa04350*.

***Janus kinase/signal transducers and activators of transcription (JAK/STAT) pathway (hsa04630)***

There are total 155 genes in this pathway, among which 146 were mapped to the expression data. So we focused the analysis on the 146 genes. The prediction errors of the three methods are 0.5132, 0.5359 and 0.5193, respectively. For this pathway, the prediction error of IVGC is lower than both IV and EN. A full list of the top selected genes is given in Table S34.

**Table S34:** List of top selected genes with a stability selection rate >60% by using any one of the three methods (IVGC, IV and EN) for pathway *hsa04630*.

| Gene Symbol | IVGC | IV   | EN   |
|-------------|------|------|------|
| IL6         | 0.74 | 0.65 | 0.91 |
| IL10        | 0.72 | 0.54 | 0.8  |
| PIAS3       | 0.71 | 0.53 | 0.79 |
| CBL         | 0.7  | 0.55 | 0.78 |
| IFNA2       | 0.69 | 0.52 | 0.81 |
| IFNW1       | 0.62 | 0.45 | 0.74 |
| CNTFR       | 0.61 | 0.31 | 0.51 |
| MYC         | 0.48 | 0.45 | 0.68 |

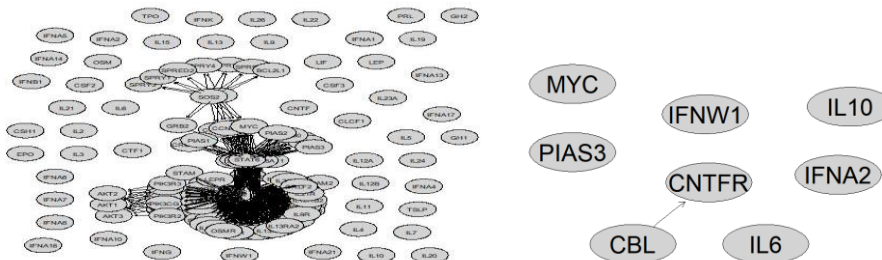

**Figure S34:** The network connectivity plots of the 146 genes (left) and the top selected genes (right) for pathway *hsa04630*.

***Wnt signaling pathway (hsa04310)***

There are total 148 genes in this pathway, among which 140 were mapped to the expression data. So we focused the analysis on the 140 genes. The prediction errors are 0.5119, 0.5548 and 0.5924. This pathway clearly demonstrates the advantage of the IVGC compared to IV and EN without incorporating graph information. For example, gene DVL2, DVL1 and DVL3 have zero selection rate with IV and EN, but more than 60% selection rate with IVGC. In checking the connectivity information of the top contributing genes listed in Table S35, these genes do have connections

with other top contributing genes such as NKD2, PRICKLE2 and PRICKLE1. Without considering the graph information, these genes will not be selected.

**Table S35:** List of top selected genes with a stability selection rate >60% by using any one of the three methods (IVGC, IV and EN) for pathway *hsa04310*.

| Gene Symbol | IVGC | IV   | EN   |
|-------------|------|------|------|
| NKD2        | 0.76 | 0.38 | 0.72 |
| PRICKLE2    | 0.75 | 0.22 | 0.59 |
| PPP2R2B     | 0.74 | 0.23 | 0.47 |
| PRICKLE1    | 0.73 | 0.18 | 0.42 |
| TBL1XR1     | 0.72 | 0.23 | 0.54 |
| AXIN1       | 0.71 | 0.21 | 0.44 |
| WNT5A       | 0.7  | 0.2  | 0.48 |
| FZD8        | 0.68 | 0.11 | 0.37 |
| DVL2        | 0.68 | 0    | 0    |
| SEN2        | 0.67 | 0.21 | 0.45 |
| DVL1        | 0.67 | 0    | 0    |
| DVL3        | 0.67 | 0    | 0    |
| FZD4        | 0.61 | 0.11 | 0.3  |
| PPP2R2A     | 0.61 | 0.03 | 0.07 |
| FZD1        | 0.6  | 0.02 | 0.17 |

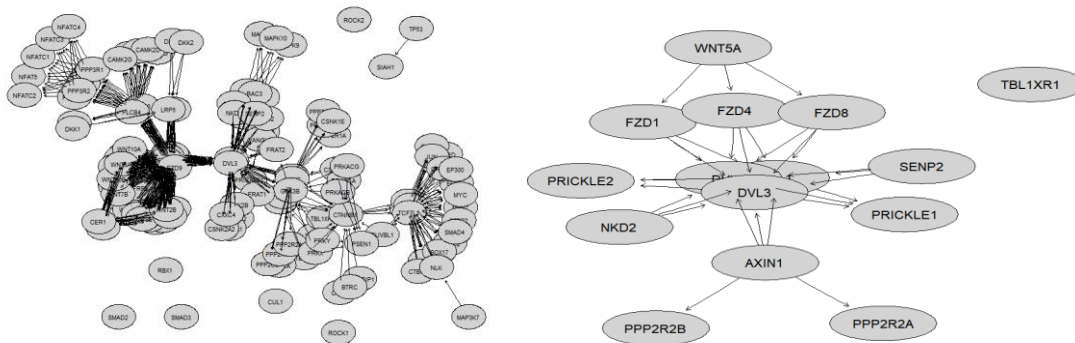

**Figure S35:** The network connectivity plots of the 140 genes (left) and the top selected genes (right) for pathway *hsa04310*.

### **VEGF signaling pathway (*hsa04370*)**

There are total 73 genes in this pathway, among which 67 were mapped to the expression data. So we focused the analysis on the 67 genes. The prediction errors for the three methods are 0.5515, 0.5660 and 0.5502. The three top genes shows no direct connection in the pathway. Thus, it is not surprise to see the prediction error for the three methods are quite similar.

**Table S36:** List of top selected genes with a stability selection rate >60% by using any one of the three methods (IVGC, IV and EN) for pathway *hsa04370*.

| Gene Symbol | IVGC | IV   | EN   |
|-------------|------|------|------|
| SRC         | 0.65 | 0.58 | 0.82 |
| SPHK1       | 0.50 | 0.42 | 0.66 |
| NFATC3      | 0.43 | 0.34 | 0.63 |



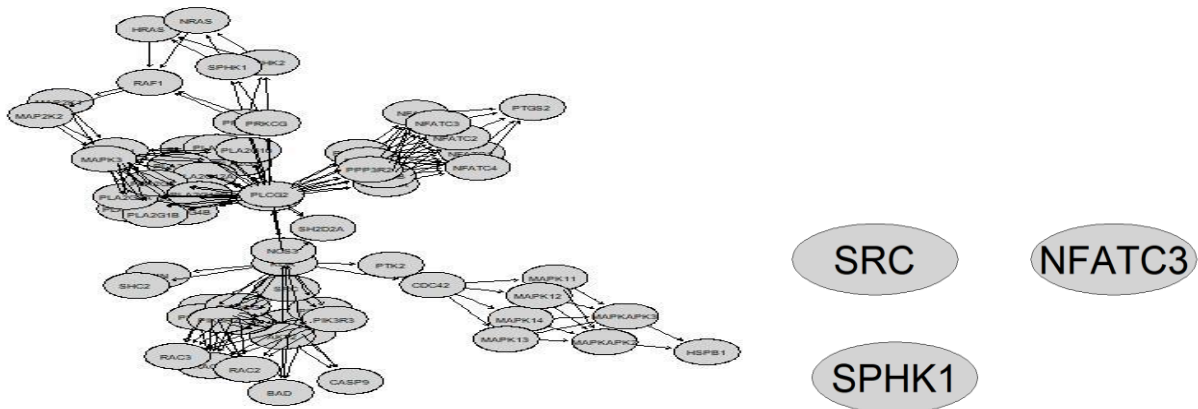

**Figure S36:** The network connectivity plots of the 67 genes (left) and the top selected genes (right) for pathway *hsa04370*.

### Signaling Molecules and Interaction

- hsa04080** [ [xml](#) | [html](#) | [graphics](#) ] Neuroactive ligand-receptor interaction
- hsa04060** [ [xml](#) | [html](#) | [graphics](#) ] Cytokine-cytokine receptor interaction
- hsa04512** [ [xml](#) | [html](#) | [graphics](#) ] ECM-receptor interaction
- hsa04514** [ [xml](#) | [html](#) | [graphics](#) ] Cell adhesion molecules (CAMs)

#### *Neuroactive ligand-receptor interaction(hsa04080)*

There are total 277 genes in this pathway, among which 238 were mapped to the expression data. So we focused the analysis on the 238 genes. The prediction errors for the three methods are 0.5107, 0.5098 and 0.5072, respectively. The prediction error difference between the three methods is not significant.

**Table S37:** List of top selected genes with a stability selection rate >60% by using any one of the three methods (IVGC, IV and EN) for pathway *hsa04080*.

| Gene Symbol | IVGC | IV   | EN   |
|-------------|------|------|------|
| ADRA2C      | 0.68 | 0.82 | 0.93 |
| GRM1        | 0.55 | 0.65 | 0.8  |
| PTGIR       | 0.51 | 0.54 | 0.78 |
| ADRA2A      | 0.5  | 0.6  | 0.77 |
| PTGER2      | 0.48 | 0.55 | 0.78 |
| TBXA2R      | 0.48 | 0.52 | 0.74 |
| FPR1        | 0.47 | 0.57 | 0.76 |
| F2          | 0.34 | 0.47 | 0.66 |

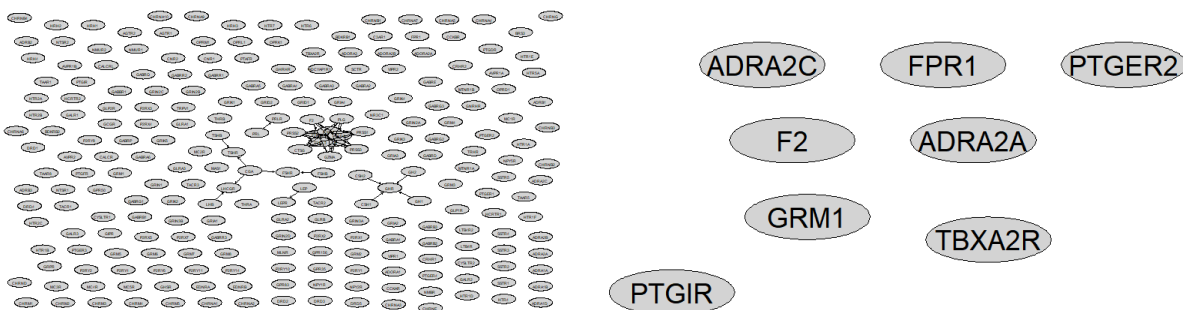

**Figure S37:** The network connectivity plots of the 238 genes (left) and the top selected genes (right) for pathway *hsa04080*.

***Cytokine-cytokine receptor interaction(hsa04060)***

There are total 294 genes in this pathway, among which 260 were mapped to the expression data. So we focused the analysis on the 260 genes. The prediction error for the three methods are 0.5366, 0.5358 and 0.5394.

**Table S38:** List of top selected genes with a stability selection rate >60% by using any one of the three methods (IVGC, IV and EN) for pathway *hsa04060*.

| Gene Symbol | IVGC | IV   | EN   |
|-------------|------|------|------|
| BMP15       | 0.65 | 0.62 | 0.88 |
| IL31RA      | 0.61 | 0.57 | 0.84 |
| ACVR1C      | 0.55 | 0.46 | 0.75 |
| IL10        | 0.53 | 0.38 | 0.7  |
| TGFB2       | 0.47 | 0.42 | 0.59 |
| IFNA2       | 0.47 | 0.36 | 0.65 |
| IL6         | 0.44 | 0.35 | 0.64 |

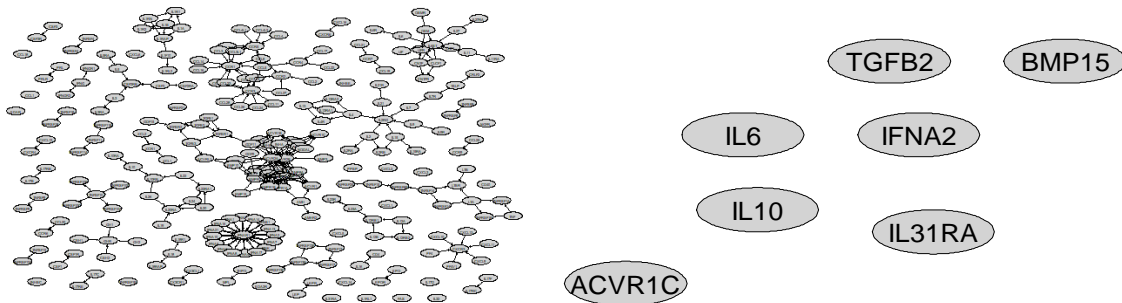

**Figure S38:** The network connectivity plots of the 260 genes (left) and the top selected genes (right) for pathway *hsa04060*.

***ECM-receptor interaction(hsa04512)***

There are total 82 genes in this pathway, among which 80 were mapped to the expression data. So we focused the analysis on the 80 genes. The prediction errors for the three methods are 0.5282, 0.5336 and 0.5185.

**Table S39:** List of top selected genes with a stability selection rate >60% by using any one of the three methods (IVGC, IV and EN) for pathway *hsa04512*.

| Gene Symbol | IVGC | IV   | EN   |
|-------------|------|------|------|
| ITGA4       | 0.81 | 0.7  | 0.96 |
| LAMC3       | 0.73 | 0.66 | 0.92 |
| TNC         | 0.72 | 0.64 | 0.93 |
| ITGA6       | 0.69 | 0.53 | 0.9  |
| ITGB1       | 0.66 | 0.37 | 0.64 |
| COL9A3      | 0.65 | 0.55 | 0.88 |
| DAG1        | 0.63 | 0.72 | 0.99 |
| THBS1       | 0.63 | 0.52 | 0.71 |
| ITGAV       | 0.62 | 0.31 | 0.66 |
| ITGB8       | 0.58 | 0.4  | 0.73 |
| ITGA5       | 0.52 | 0.53 | 0.83 |
| THBS4       | 0.51 | 0.47 | 0.86 |

|        |      |      |      |
|--------|------|------|------|
| COL9A1 | 0.5  | 0.44 | 0.8  |
| VWF    | 0.49 | 0.42 | 0.65 |
| LAMB2  | 0.47 | 0.4  | 0.74 |
| COL4A3 | 0.44 | 0.38 | 0.7  |

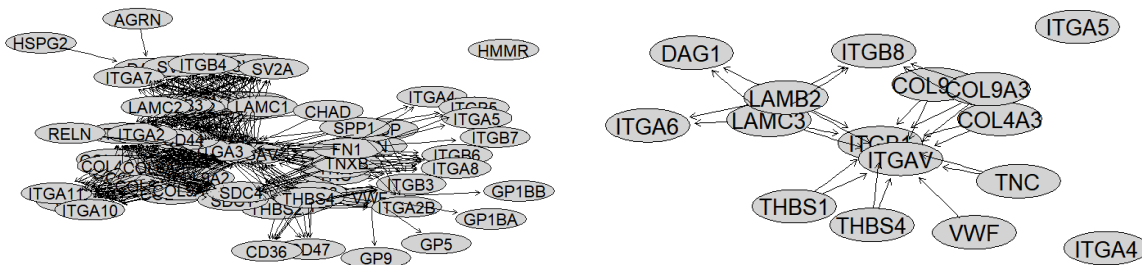

**Figure S39:** The network connectivity plots of the 80 genes (left) and the top selected genes (right) for pathway *hsa04512*.

### Cell adhesion molecules (CAMs)(*hsa04514*)

There are total 144 genes in this pathway, among which 129 were mapped to the expression data. So we focused the analysis on the 129 genes. The prediction errors for the three methods are 0.5460, 0.5381 and 0.5307.

**Table S40:** List of top selected genes with a stability selection rate >60% by using any one of the three methods (IVGC, IV and EN) for pathway *hsa04514*.

| Gene Symbol | IVGC | IV   | EN   |
|-------------|------|------|------|
| CLDN4       | 0.9  | 0.86 | 0.97 |
| NEO1        | 0.8  | 0.75 | 0.94 |
| ITGA4       | 0.66 | 0.64 | 0.88 |
| NRXN2       | 0.52 | 0.53 | 0.82 |
| CLDN8       | 0.52 | 0.49 | 0.76 |
| CLDN10      | 0.45 | 0.4  | 0.63 |
| CLDN2       | 0.42 | 0.34 | 0.63 |

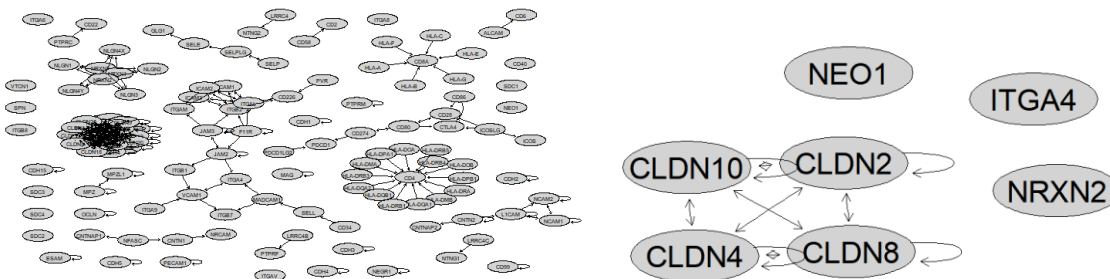

**Figure S40:** The network connectivity plots of the 129 genes (left) and the top selected genes (right) for pathway *hsa04514*.

### Cell Growth and Death

[hsa04110](#) [ [xml](#) | [html](#) | [graphics](#) ] Cell cycle

[hsa04210](#) [ [xml](#) | [html](#) | [graphics](#) ] Apoptosis

#### Cell cycle (*hsa04110*)

There are total 115 genes in this pathway, among which 101 were mapped to the expression data. So we focused the analysis on the 101 genes. The prediction errors of the three methods are 0.5344,

0.5502 and 0.5334, respectively. After the stability selection, there is only one gene with selection rate >60%. The selection results indicate that this pathway does not play an important role in the activity of CYP2E1. Both IVGC and EN picked up gene TGFB2 with a selection rate >60%.

**Table S41:** List of top selected genes with a stability selection rate >60% by using any one of the three methods (IVGC, IV and EN) for pathway *hsa04110*.

| Gene Symbol | IVGC | IV   | EN   |
|-------------|------|------|------|
| TGFB2       | 0.62 | 0.46 | 0.75 |

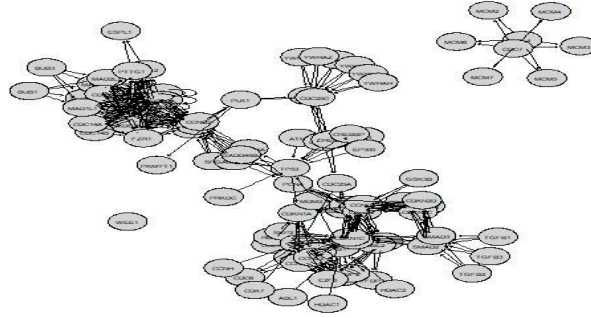

**Figure S41:** The network connectivity plots of the 101 genes in pathway *hsa04110*.

### Apoptosis (*hsa04210*)

There are total 85 genes in this pathway, among which 78 were mapped to the expression data. So we focused the analysis on the 78 genes. The prediction errors are 0.5133, 0.5155 and 0.5194. Although IVGC has smaller prediction error, but the difference among the three methods is not remarkable. The selection rate for all top genes between IVGC and EN is quite similar.

**Table S42:** List of top selected genes with a stability selection rate >60% by using any one of the three methods (IVGC, IV and EN) for pathway *hsa04210*.

| Gene Symbol | IVGC | IV   | EN   |
|-------------|------|------|------|
| ITGA4       | 0.88 | 0.74 | 0.93 |
| PPP1CB      | 0.88 | 0.63 | 0.86 |
| SLC9A1      | 0.87 | 0.8  | 0.95 |
| FGFR2       | 0.87 | 0.67 | 0.89 |
| MYL9        | 0.86 | 0.64 | 0.87 |
| FGFR4       | 0.85 | 0.72 | 0.91 |
| SRC         | 0.85 | 0.68 | 0.87 |
| PPP1R12A    | 0.78 | 0.63 | 0.77 |
| F2          | 0.76 | 0.62 | 0.81 |
| WASF1       | 0.75 | 0.37 | 0.73 |
| ITGA5       | 0.72 | 0.37 | 0.66 |
| PFN2        | 0.69 | 0.47 | 0.64 |
| ROCK2       | 0.67 | 0.22 | 0.34 |
| BDKRB2      | 0.64 | 0.43 | 0.63 |
| PDGFRA      | 0.64 | 0.35 | 0.55 |
| CYFIP2      | 0.63 | 0.31 | 0.65 |
| FGF3        | 0.58 | 0.34 | 0.6  |

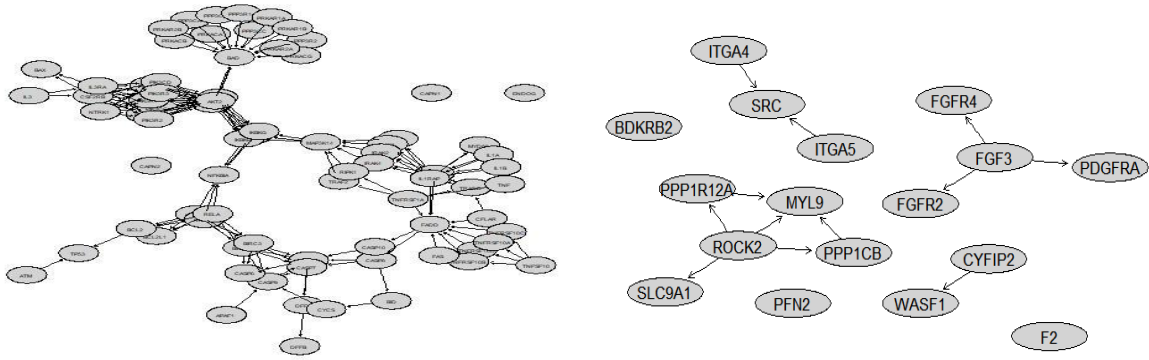

**Figure S42:** The network connectivity plots of the 78 genes (left) and the top selected genes (right) for pathway *hsa04210*.

### Cell Communication

**hsa04510** [ [xml](#) | [html](#) | [graphics](#) ] Focal adhesion

**hsa04520** [ [xml](#) | [html](#) | [graphics](#) ] Adherens junction

**hsa04540** [ [xml](#) | [html](#) | [graphics](#) ] Gap junction

#### *Focal adhesion(hsa04510)*

There are total 199 genes in this pathway, among which 183 were mapped to the expression data. So we focused the analysis on the 183 genes. The prediction errors for the three methods are 0.5336, 0.5383 and 0.5233. The selection rate between IVGC and EN is quite similar.

**Table S43:** List of top selected genes with a stability selection rate >60% by using any one of the three methods (IVGC, IV and EN) for pathway *hsa04510*.

| Gene Symbol | IVGC | IV   | EN   |
|-------------|------|------|------|
| FLNA        | 0.85 | 0.53 | 0.9  |
| SRC         | 0.8  | 0.49 | 0.84 |
| THBS1       | 0.78 | 0.51 | 0.68 |
| TNC         | 0.76 | 0.39 | 0.73 |
| MYL9        | 0.72 | 0.47 | 0.79 |
| LAMC3       | 0.72 | 0.4  | 0.7  |
| ITGA4       | 0.71 | 0.5  | 0.86 |
| PPP1R12A    | 0.7  | 0.36 | 0.69 |
| ITGA5       | 0.69 | 0.29 | 0.65 |
| PPP1CB      | 0.67 | 0.2  | 0.57 |
| COL9A3      | 0.65 | 0.3  | 0.61 |
| THBS4       | 0.64 | 0.25 | 0.61 |

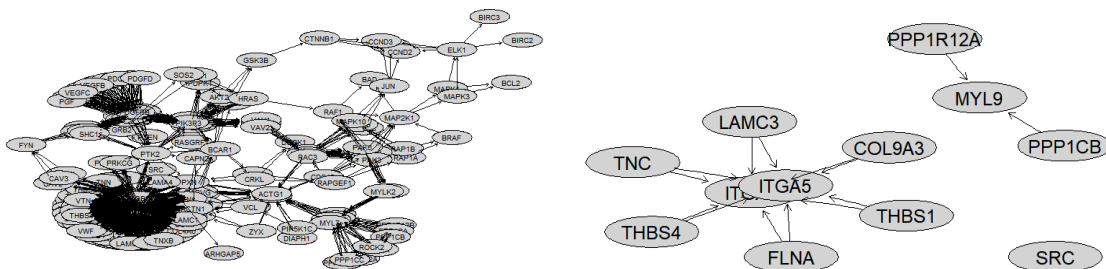

**Figure S43:** The network connectivity plots of the 183 genes (left) and the top selected genes (right) for pathway *hsa04510*.

**Adherens junction(*hsa04520*)**

There are total 72 genes in this pathway, among which 65 were mapped to the expression data. So we focused the analysis on the 65 genes. The prediction errors for the three methods are 0.4950, 0.4938 and 0.4959. For this pathway, the prediction error among the three methods is quite similar. The selection rate for the top contributing genes between IVGC and IV is also quite similar, which can be explained by the non-connectivity between the two top genes.

**Table S44:** List of top selected genes with a stability selection rate >60% by using any one of the three methods (IVGC, IV and EN) for pathway *hsa04520*.

| Gene Symbol | IVGC | IV   | EN   |
|-------------|------|------|------|
| TJP1        | 0.97 | 0.99 | 1    |
| SRC         | 0.84 | 0.84 | 0.95 |

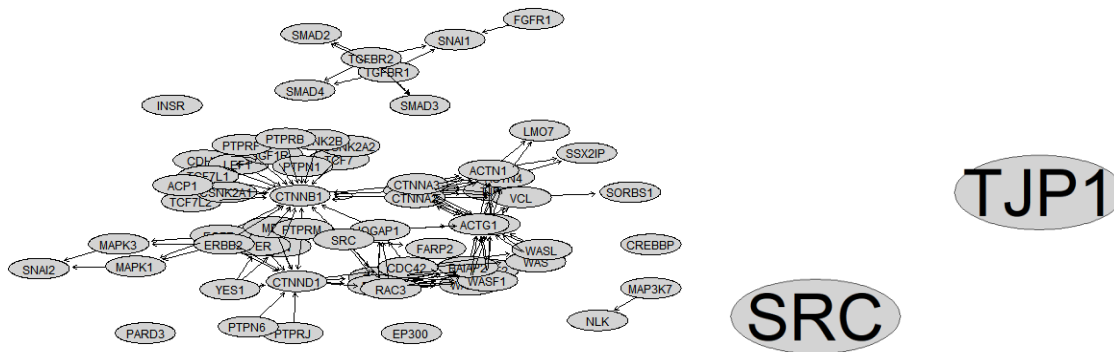

**Figure S44:** The network connectivity plots of the 65 genes (left) and the top selected genes (right) for pathway *hsa04520*.

**Gap junction(*hsa04540*)**

There are total 88 genes in this pathway, among which 70 were mapped to the expression data. So we focused the analysis on the 70 genes. The prediction errors for the three methods are 0.5034, 0.5059 and 0.5065. The prediction errors for the three methods are quite similar. In viewing the network connectivity of the top contributing genes in Fig. S45, it is not surprise that the three methods perform similar to each other.

**Table S45:** List of top selected genes with a stability selection rate >60% by using any one of the three methods (IVGC, IV and EN) for pathway *hsa04540*.

| Gene Symbol | IVGC | IV   | EN   |
|-------------|------|------|------|
| TJP1        | 0.96 | 0.97 | 0.99 |
| GRM1        | 0.9  | 0.84 | 0.91 |
| SRC         | 0.88 | 0.86 | 0.94 |
| ITPR3       | 0.71 | 0.58 | 0.7  |
| ITPR2       | 0.64 | 0.48 | 0.63 |
| TUBB2B      | 0.62 | 0.51 | 0.61 |
| GRM5        | 0.58 | 0.47 | 0.63 |

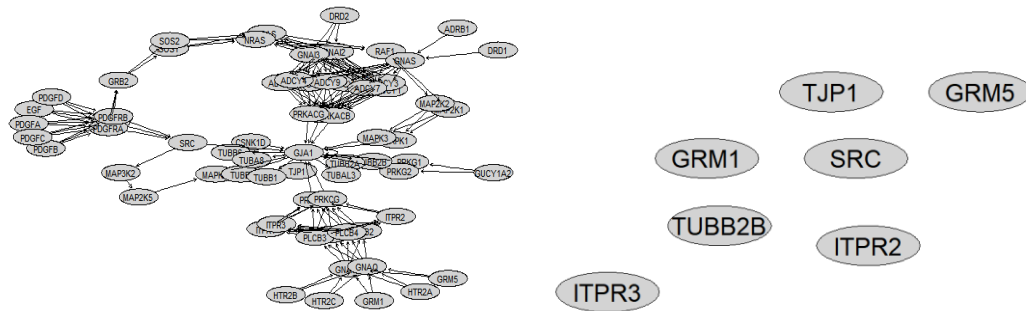

**Figure S45:** The network connectivity plots of the 70 genes (left) and the top selected genes (right) for pathway *hsa04540*.

## Endocrine System

**hsa04910** [ [xml](#) | [html](#) | [graphics](#) ] Insulin signaling pathway

**hsa04920** [ [xml](#) | [html](#) | [graphics](#) ] Adipocytokine signaling pathway

**hsa03320** [ [xml](#) | [html](#) | [graphics](#) ] PPAR signaling pathway

**hsa04912** [ [xml](#) | [html](#) | [graphics](#) ] GnRH signaling pathway

### *Insulin signaling pathway(hsa04910)*

There are total 137 genes in this pathway, among which 128 were mapped to the expression data. So we focused the analysis on the 128 genes. The prediction errors are 0.5324, 0.5343 and 0.5224 for the three methods. The selection rates for most genes between IVGC and IV are quite similar and are systematically lower than EN. This may explain the relatively larger prediction error of the two methods compared to EN.

**Table S46:** List of top selected genes with a stability selection rate >60% by using any one of the three methods (IVGC, IV and EN) for pathway *hsa04910*.

| Gene Symbol | IVGC | IV   | EN   |
|-------------|------|------|------|
| PHKA2       | 0.88 | 0.89 | 0.98 |
| PYGL        | 0.82 | 0.83 | 0.95 |
| PRKCZ       | 0.54 | 0.52 | 0.77 |
| CBL         | 0.53 | 0.57 | 0.79 |
| PYGB        | 0.52 | 0.59 | 0.78 |
| PPP1CB      | 0.5  | 0.51 | 0.75 |
| CALM2       | 0.49 | 0.49 | 0.78 |
| EIF4E2      | 0.42 | 0.49 | 0.68 |

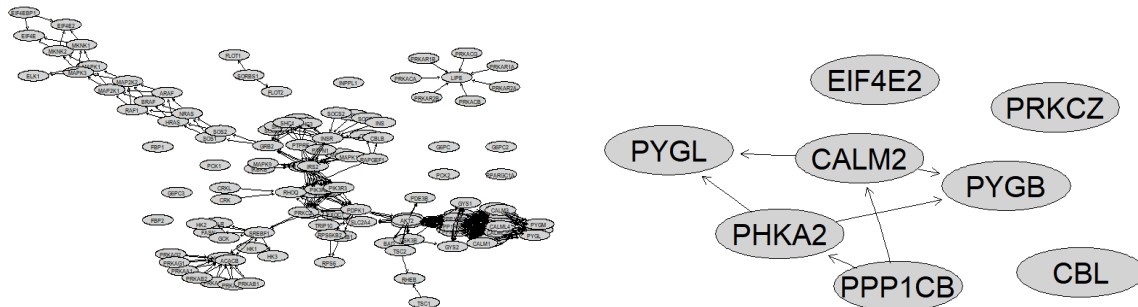

**Figure S46:** The network connectivity plots of the 128 genes (left) and the top selected genes (right) for pathway *hsa04910*.

### Adipocytokine signaling pathway(*hsa04920*)

There are total 69 genes in this pathway, among which 67 were mapped to the expression data. So we focused the analysis on the 67 genes. The prediction errors are 0.5279, 0.5172 and 0.5207 for the three methods.

**Table S47:** List of top selected genes with a stability selection rate >60% by using any one of the three methods (IVGC, IV and EN) for pathway *hsa04920*.

| Gene Symbol | IVGC | IV   | EN   |
|-------------|------|------|------|
| PPARA       | 0.63 | 0.66 | 0.87 |
| CPT1A       | 0.57 | 0.62 | 0.8  |

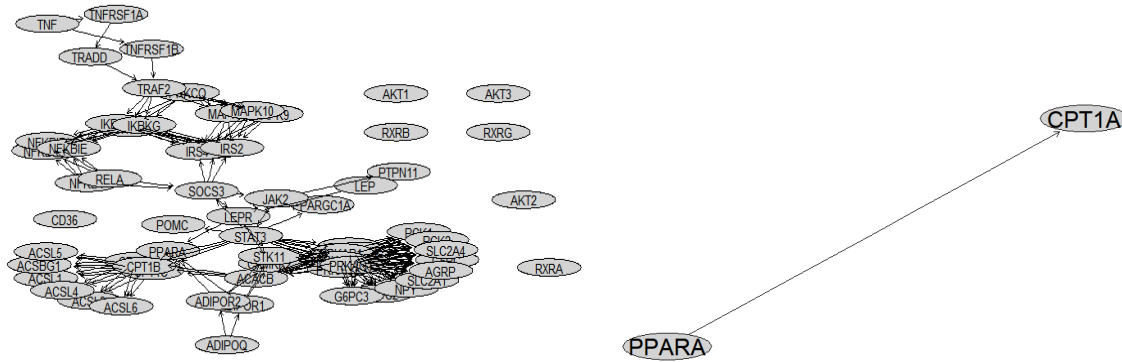

**Figure S47:** The network connectivity plots of the 67 genes (left) and the top selected genes (right) for pathway *hsa04920*.

### PPAR signaling pathway(*hsa03320*)

There are total 74 genes in this pathway, among which 68 were mapped to the expression data. So we focused the analysis on the 68 genes. The prediction errors are 0.4812, 0.4898 and 0.4820 for IVGC, IV and EN, respectively. From Table S48, we can see that IVGC has higher selection rate for the top contributing genes compared to IV and EN.

**Table S48:** List of top selected genes with a stability selection rate >60% by using any one of the three methods (IVGC, IV and EN) for pathway *hsa03320*.

| Gene Symbol | IVGC | IV   | EN   |
|-------------|------|------|------|
| DBI         | 0.99 | 0.97 | 0.98 |
| FABP1       | 0.99 | 0.94 | 0.97 |
| PPARA       | 0.98 | 0.95 | 0.99 |
| CPT1A       | 0.98 | 0.86 | 0.93 |
| MMP1        | 0.9  | 0.83 | 0.89 |
| SLC27A5     | 0.88 | 0.79 | 0.89 |
| APOA5       | 0.78 | 0.24 | 0.43 |
| FABP6       | 0.72 | 0.34 | 0.57 |
| APOA2       | 0.71 | 0.37 | 0.58 |
| FADS2       | 0.7  | 0.17 | 0.46 |
| CYP8B1      | 0.69 | 0.23 | 0.44 |
| CYP27A1     | 0.66 | 0.27 | 0.46 |
| RXRG        | 0.57 | 0.45 | 0.68 |



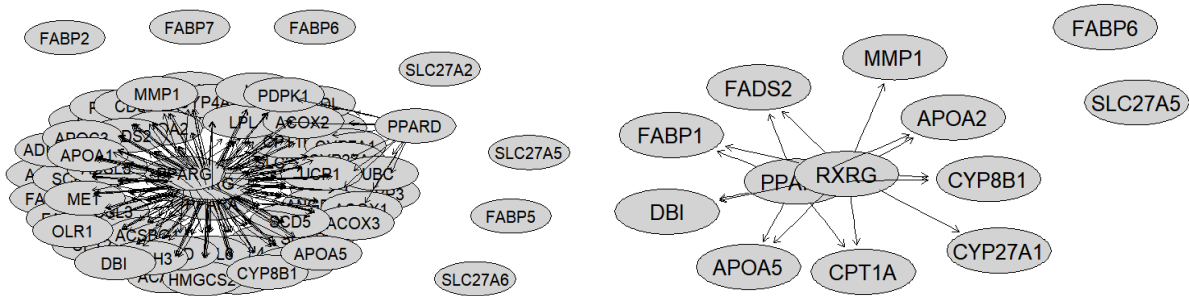

**Figure S48:** The network connectivity plots of the 68 genes (left) and the top selected genes (right) for pathway *hsa03320*.

**GnRH signaling pathway(*hsa04912*)**

There are total 93 genes in this pathway, among which 89 were mapped to the expression data. So we focused the analysis on the 89 genes. The prediction errors are 0.5071, 0.5547 and 0.5321 for IVGC, IV and EN, respectively. Of particular interest is the gene HBEGF which has a selection rate of 0.68 with IVGC, compared to 0.03 and 0.14 with IV and EN. In checking the network connectivity information in Fig. S49, we can see that gene HBEGF is connected with gene MMP2 and MMP14. Both genes have a high selection rate with EN.

**Table S49:** List of top selected genes with a stability selection rate >60% by using any one of the three methods (IVGC, IV and EN) for pathway *hsa04912*.

| Gene Symbol | IVGC | IV   | EN   |
|-------------|------|------|------|
| MMP14       | 0.83 | 0.43 | 0.78 |
| CACNA1D     | 0.82 | 0.42 | 0.8  |
| ITPR2       | 0.8  | 0.34 | 0.74 |
| MAP2K7      | 0.8  | 0.33 | 0.75 |
| CALM2       | 0.8  | 0.32 | 0.75 |
| MMP2        | 0.79 | 0.32 | 0.62 |
| ADCY3       | 0.78 | 0.32 | 0.63 |
| SRC         | 0.78 | 0.29 | 0.78 |
| ITPR3       | 0.77 | 0.37 | 0.71 |
| MAP3K4      | 0.7  | 0.34 | 0.71 |
| JUN         | 0.69 | 0.22 | 0.57 |
| HBEGF       | 0.68 | 0.03 | 0.14 |
| FSHB        | 0.67 | 0.24 | 0.6  |
| MAPK14      | 0.62 | 0.11 | 0.39 |

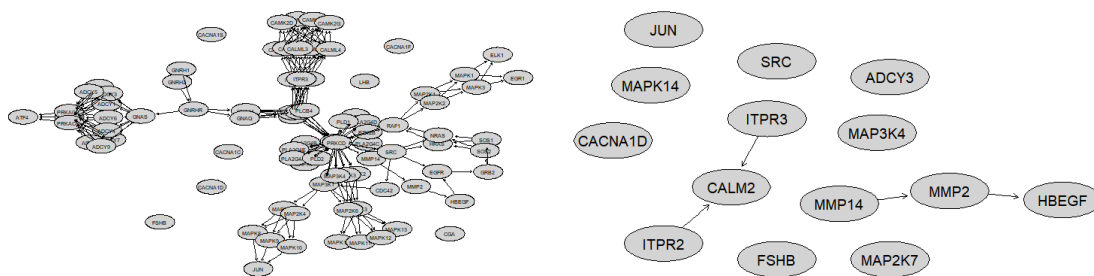

**Figure S49:** The network connectivity plots of the 89 genes (left) and the top selected genes (right) for pathway *hsa04912*.

## Immune System

- hsa04610** [ [xml](#) | [html](#) | [graphics](#) ] Complement and coagulation cascades
- hsa04620** [ [xml](#) | [html](#) | [graphics](#) ] Toll-like receptor signaling pathway
- hsa04650** [ [xml](#) | [html](#) | [graphics](#) ] Natural killer cell mediated cytotoxicity
- hsa04612** [ [xml](#) | [html](#) | [graphics](#) ] Antigen processing and presentation
- hsa04660** [ [xml](#) | [html](#) | [graphics](#) ] T cell receptor signaling pathway

### **Complement and coagulation cascades (hsa04610)**

There are total 79 genes in this pathway, among which 71 were mapped to the expression data. So we focused the analysis on the 71 genes. The prediction errors are 0.5427, 0.5592 and 0.5558 for IVGC, IV and EN, respectively.

**Table S50:** List of top selected genes with a stability selection rate >60% by using any one of the three methods (IVGC, IV and EN) for pathway *hsa04610*.

| Gene Symbol | IVGC | IV   | EN   |
|-------------|------|------|------|
| C6          | 0.84 | 0.72 | 0.92 |
| VWF         | 0.54 | 0.37 | 0.64 |
| C9          | 0.49 | 0.39 | 0.67 |
| F7          | 0.45 | 0.45 | 0.72 |

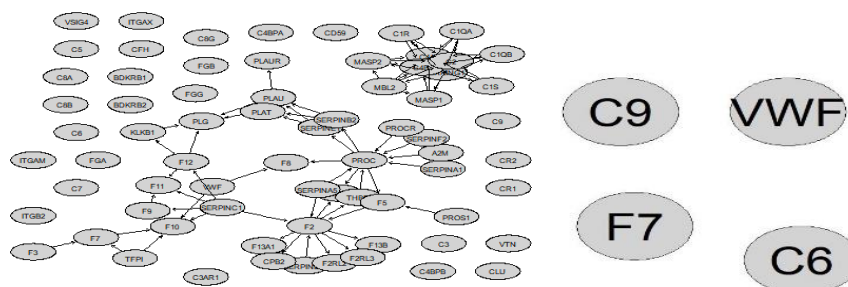

**Figure S50:** The network connectivity plots of the 71 genes (left) and the top selected genes (right) for pathway *hsa04610*.

### **Toll-like receptor signaling pathway(hsa04620)**

There are total 104 genes in this pathway, among which 100 were mapped to the expression data. So we focused the analysis on the 100 genes. The prediction errors are 0.5482, 0.5468 and 0.5389 for IVGC, IV and EN, respectively. Only one gene passed the 60% threshold with EN.

**Table S51:** List of top selected genes with a stability selection rate >60% by using any one of the three methods (IVGC, IV and EN) for pathway *hsa04620*.

| Gene Symbol | IVGC | IV   | EN   |
|-------------|------|------|------|
| IL6         | 0.53 | 0.46 | 0.75 |

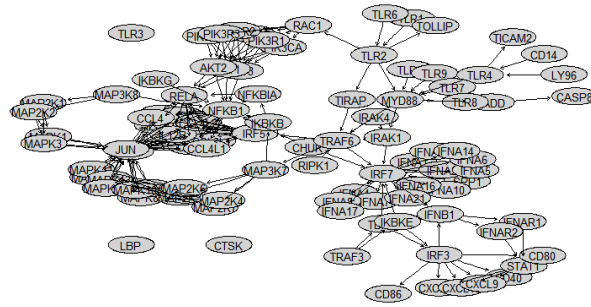

**Figure S51:** The network connectivity plots of the 100 genes in pathway *hsa04620*.

**Natural killer cell mediated cytotoxicity(*hsa04650*)**

There are total 131 genes in this pathway, among which 124 were mapped to the expression data. So we focused the analysis on the 124 genes. After the stability selection, no single gene has a selection rate larger than 60%, indicating the less important role of this pathway in the expression activity of enzyme CYP2E1.

**Antigen processing and presentation(*hsa04612*)**

There are total 77 genes in this pathway, among which 74 were mapped to the expression data. So we focused the analysis on the 74 genes. After the stability selection, the selection rates for all genes are less than 50% with all the three methods, indicating the less important role of this pathway in the expression activity of enzyme CYP2E1.

**T cell receptor signaling pathway(*hsa04660*)**

There are total 101 genes in this pathway, among which 94 were mapped to the expression data. So we focused the analysis on the 94 genes. The prediction errors are 0.5562, 0.5577 and 0.5786 for IVGC, IV and EN, respectively. Although the prediction errors of IVGC and IV are smaller than EN, the selection rates of all genes with IVGC and IV are all less than 60%. EN did picked up two genes with the selection rate passing the 0.6 threshold.

**Table S52:** List of top selected genes with a stability selection rate >60% by using any one of the three methods (IVGC, IV and EN) for pathway *hsa04660*.

| Gene Symbol | IVGC | IV   | EN   |
|-------------|------|------|------|
| IL10        | 0.42 | 0.38 | 0.68 |
| FOS         | 0.41 | 0.37 | 0.66 |

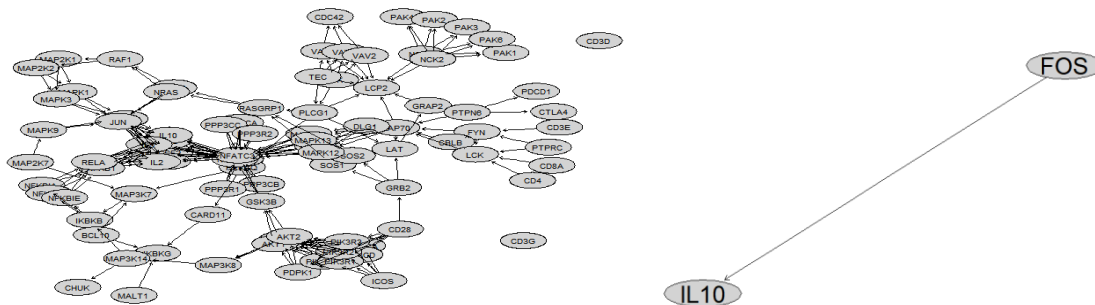

**Figure S52:** The network connectivity plots of the 94 genes (left) and the top selected genes (right) for pathway *hsa04660*.

## Nervous System

**hsa04720** [ [xml](#) | [html](#) | [graphics](#) ] Long-term potentiation

**hsa04730** [ [xml](#) | [html](#) | [graphics](#) ] Long-term depression

### Long-term potentiation(*hsa04720*)

There are total 67 genes in this pathway, among which 64 were mapped to the expression data. So we focused the analysis on the 64 genes. The prediction errors are 0.5441, 0.5487 and 0.5471 for IVGC, IV and EN, respectively. IV has overall much lower selection rate for all genes than IVGC or EN does. The network connectivity for the top contributing genes shown in Fig. S53 indicates that gene CALM2 has a few connections with a few other genes. From Table S53, we can tell that those genes having a connection with CALM2 have relatively high selection rates with IVGC than those with EN. This pathway analysis clearly shows the advantage of the IVGC.

**Table S53:** List of top selected genes with a stability selection rate >60% by using any one of the three methods (IVGC, IV and EN) for pathway *hsa04720*.

| Gene Symbol | IVGC | IV   | EN   |
|-------------|------|------|------|
| GRM1        | 0.87 | 0.64 | 0.92 |
| PPP1CB      | 0.87 | 0.61 | 0.9  |
| ITPR3       | 0.86 | 0.62 | 0.88 |
| ITPR2       | 0.82 | 0.53 | 0.8  |
| CALM2       | 0.78 | 0.5  | 0.81 |
| GRM5        | 0.72 | 0.38 | 0.72 |
| PPP3CC      | 0.71 | 0.34 | 0.65 |
| ITPR1       | 0.71 | 0.24 | 0.6  |
| PPP3R1      | 0.66 | 0.26 | 0.55 |
| RPS6KA1     | 0.66 | 0.22 | 0.6  |
| GRIA2       | 0.64 | 0.32 | 0.64 |
| GRIN2A      | 0.64 | 0.23 | 0.58 |
| PPP3CB      | 0.62 | 0.18 | 0.49 |
| RAP1B       | 0.62 | 0.11 | 0.41 |
| PPP1CA      | 0.61 | 0.17 | 0.56 |
| PPP3R2      | 0.6  | 0.17 | 0.5  |
| NRAS        | 0.6  | 0.15 | 0.51 |

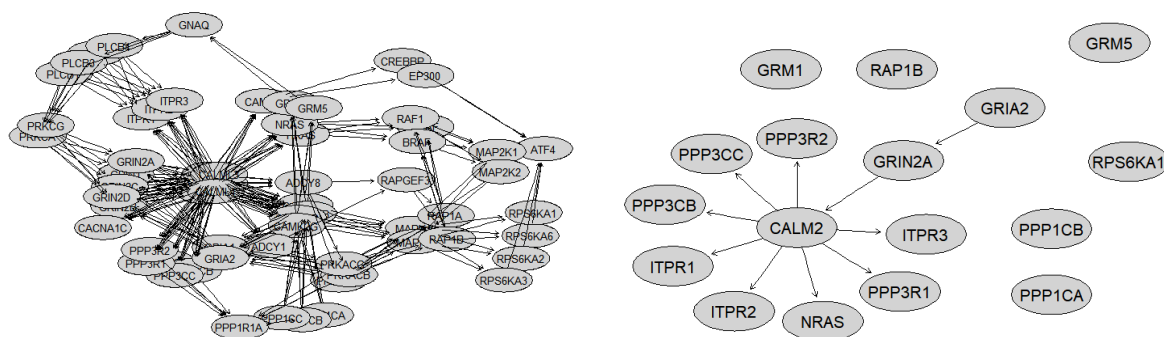

**Figure S53:** The network connectivity plots of the 64 genes (left) and the top selected genes (right) for pathway *hsa04720*.

### Long-term depression(*hsa04730*)

There are total 60 genes in this pathway, among which 54 were mapped to the expression data. So we focused the analysis on the 54 genes. The prediction errors are 0.5347, 0.5311 and 0.5300 for

IVGC, IV and EN, respectively. For this pathway, EN has higher selection rates for most genes than IVGC or IV does.

**Table S54:** List of top selected genes with a stability selection rate >60% by using any one of the three methods (IVGC, IV and EN) for pathway *hsa04730*.

| Gene Symbol | IVGC | IV   | EN   |
|-------------|------|------|------|
| GRM1        | 0.67 | 0.57 | 0.81 |
| ITPR3       | 0.64 | 0.55 | 0.74 |
| ITPR2       | 0.52 | 0.43 | 0.61 |

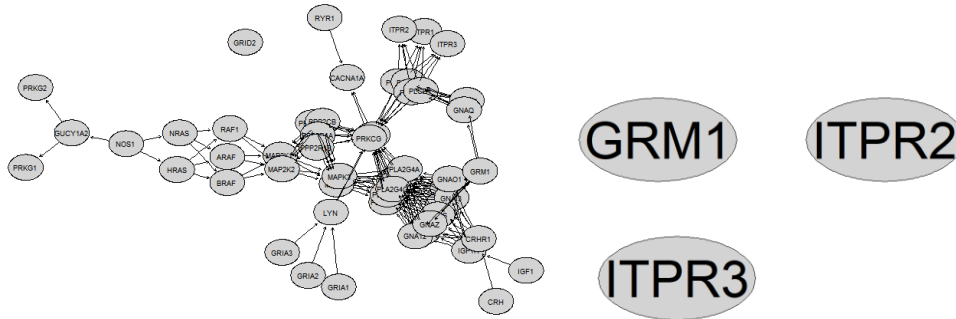

**Figure S54:** The network connectivity plots of the 54 genes (left) and the top selected genes (right) for pathway *hsa04730*.

## Sensory System

[hsa04740](#) [ [xml](#) | [html](#) | [graphics](#) ] Olfactory transduction

[hsa04742](#) [ [xml](#) | [html](#) | [graphics](#) ] Taste transduction

### Olfactory transduction(*hsa04740*)

There are total 448 genes in this pathway, among which 364 were mapped to the expression data. So we focused the analysis on the 364 genes. The prediction errors are 0.5265, 0.5045 and 0.5177 for IVGC, IV and EN, respectively. For this pathway, IV has smaller prediction error than IVGC or EN does. Although gene *ARRB2* is a hub gene in the network, it may not be significantly associated with CYP2E1 enzyme activity. Thus, the connectivity information or the correlation information of this gene with other genes may inflate the selection rates of genes related with it. But still IVGC has smaller selection rate (0.58) for *ARRB2* than EN does (0.65).

**Table S55:** List of top selected genes with a stability selection rate >60% by using any one of the three methods (IVGC, IV and EN) for pathway *hsa04740*.

| Gene Symbol | IVGC | IV   | EN   |
|-------------|------|------|------|
| OR10G4      | 0.92 | 0.79 | 0.95 |
| OR8S1       | 0.9  | 0.64 | 0.96 |
| OR6B1       | 0.87 | 0.6  | 0.92 |
| OR13A1      | 0.86 | 0.67 | 0.91 |
| OR52K1      | 0.86 | 0.64 | 0.93 |
| OR10G7      | 0.85 | 0.59 | 0.87 |
| ADCY3       | 0.79 | 0.51 | 0.84 |
| OR52E5      | 0.79 | 0.42 | 0.77 |
| CNGA2       | 0.78 | 0.55 | 0.81 |
| OR6C2       | 0.75 | 0.37 | 0.7  |
| OR2T12      | 0.74 | 0.43 | 0.77 |

|        |      |      |      |
|--------|------|------|------|
| OR4C6  | 0.74 | 0.4  | 0.77 |
| CALM2  | 0.73 | 0.45 | 0.79 |
| OR5AR1 | 0.68 | 0.35 | 0.71 |
| OR4F15 | 0.67 | 0.33 | 0.68 |
| OR11H4 | 0.62 | 0.39 | 0.71 |
| OR5K3  | 0.61 | 0.29 | 0.64 |
| ARRB2  | 0.58 | 0.29 | 0.65 |

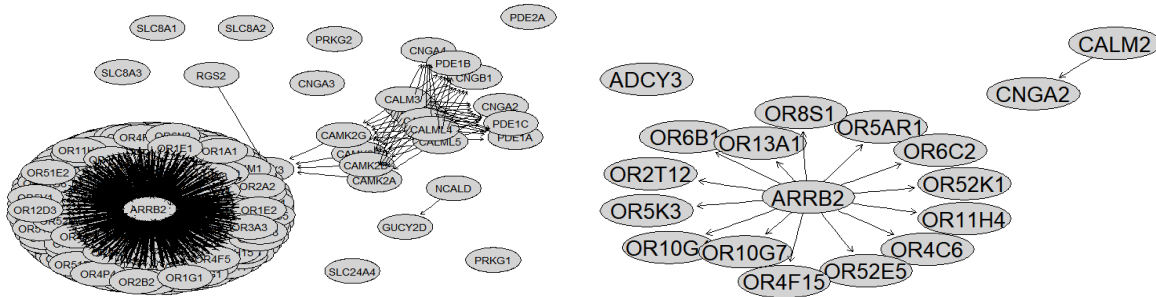

**Figure S55:** The network connectivity plots of the 364 genes (left) and the top selected genes (right) for pathway *hsa04740*.

### Taste transduction(*hsa04742*)

There are total 83 genes in this pathway, among which 74 were mapped to the expression data. So we focused the analysis on the 74 genes. The prediction errors are 0.5242, 0.5379 and 0.5298 for IVGC, IV and EN, respectively. The overall network connectivity of genes in this pathway is not very strong. Still, IVGC has the smallest prediction error among the three. It picked up two genes *GRM1* and *ITPR3* as IV did, while EN picked up two more genes. The extra two more genes by EN may be due to actual correlation of the expression measures between the two genes. Since the four genes have no direct connection in the network, the selection results between IVGC and IV are quite similar to each other. This again shows the robustness of the IVGC method.

**Table S56:** List of top selected genes with a stability selection rate >60% by using any one of the three methods (IVGC, IV and EN) for pathway *hsa04742*.

| Gene Symbol | IVGC | IV   | EN   |
|-------------|------|------|------|
| GRM1        | 0.73 | 0.74 | 0.89 |
| ITPR3       | 0.7  | 0.72 | 0.85 |
| GNB3        | 0.36 | 0.42 | 0.61 |
| SCNN1G      | 0.33 | 0.41 | 0.65 |

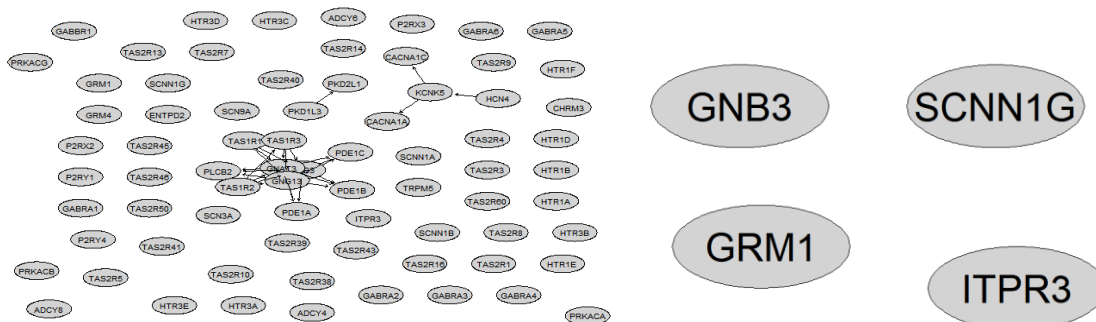

**Figure S56:** The network connectivity plots of the 74 genes (left) and the top selected genes (right) for pathway *hsa04742*.

## Development

**hsa04360** [ [xml](#) | [html](#) | [graphics](#) ] Axon guidance

There are total 175 genes in this pathway, among which 163 were mapped to the expression data. So we focused the analysis on the 163 genes. There is no single gene with a selection rate larger than 0.6 by all three methods, indicating the less important role of this pathway in expressing CYP2E1 enzyme activity.

## Behavior

**hsa04710** [ [xml](#) | [html](#) | [graphics](#) ] Circadian rhythm

There are total 31 genes in this pathway, among which 26 were mapped to the expression data. So we focused the analysis on the 26 genes. The prediction errors are 0.5351, 0.5408 and 0.5443 for IVGC, IV and EN, respectively. However, no genes have selection rate larger than 0.6 by IVGC and IV. Although EN has one gene (*RORA*) with a selection rate larger than 0.6, there is no literature report shown that this gene is associated with CYP2E1 enzyme activity. Thus, this gene could be potentially a false positive due to pseudo correlation between gene expressions.

**Table S57:** List of top selected genes with a stability selection rate >60% by using any one of the three methods (IVGC, IV and EN) for pathway *hsa04710*.

| Gene Symbol | IVGC | IV  | EN   |
|-------------|------|-----|------|
| RORA        | 0.5  | 0.5 | 0.72 |

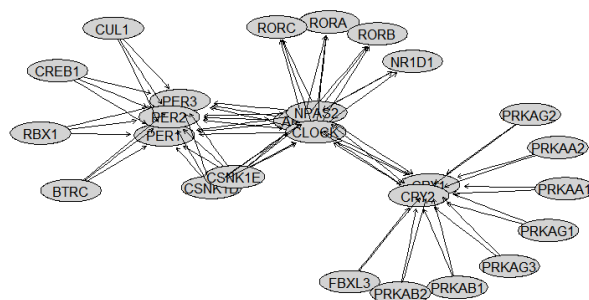

**Figure S57:** The network connectivity plots of the 26 genes in pathway *hsa04710*.

## Infectious Diseases

**hsa05120** [ [xml](#) | [html](#) | [graphics](#) ] Epithelial cell signaling in Helicobacter pylori infection

There are total 68 genes in this pathway, among which 61 were mapped to the expression data. So we focused the analysis on the 61 genes. The prediction errors are 0.5035, 0.4984 and 0.4996 for IVGC, IV and EN, respectively. Two genes have a selection rate larger than 0.6 and the selection rate between IVGC and IV is quite similar, due to loose connectivity of top contributing genes in this pathway.

**Table S58:** List of top selected genes with a stability selection rate >60% by using any one of the three methods (IVGC, IV and EN) for pathway *hsa05120*.

| Gene Symbol | IVGC | IV   | EN   |
|-------------|------|------|------|
| TJP1        | 0.95 | 0.97 | 0.99 |
| SRC         | 0.81 | 0.82 | 0.95 |

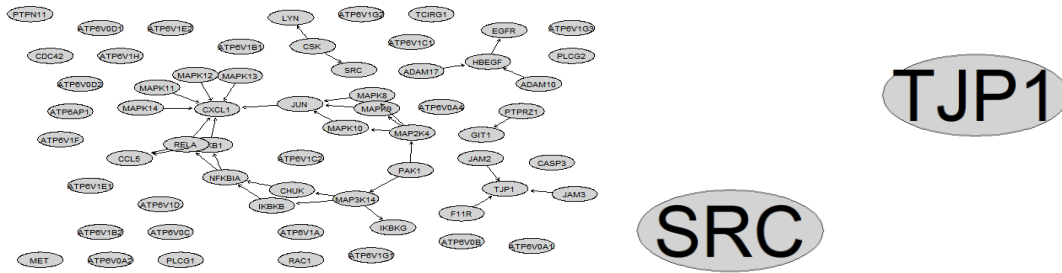

**Figure S58:** The network connectivity plots of the 61 genes (left) and the top selected genes (right) for pathway *hsa05120*.

## Neurodegenerative Disorders

**hsa05010** [ [xml](#) | [html](#) | [graphics](#) ] Alzheimer's disease

**hsa05020** [ [xml](#) | [html](#) | [graphics](#) ] Parkinson's disease

**hsa05030** [ [xml](#) | [html](#) | [graphics](#) ] Amyotrophic lateral sclerosis (ALS)

### *Alzheimer's disease(hsa05010)*

There are total 171 genes in this pathway, among which 140 were mapped to the expression data. So we focused the analysis on the 140 genes. The prediction errors are 0.5342, 0.5735 and 0.5341 for IVGC, IV and EN, respectively. For this pathway, the prediction error between IVGC and EN is quite similar. However, the selection rates of all top contributing genes between IVGC and IV are quite similar, due to loose connectivity of genes in this pathway. EN may over select genes in this pathway than IVGC or IV does.

**Table S59:** List of top selected genes with a stability selection rate >60% by using any one of the three methods (IVGC, IV and EN) for pathway *hsa05010*.

| Gene Symbol | IVGC | IV   | EN   |
|-------------|------|------|------|
| BACE2       | 0.81 | 0.8  | 0.96 |
| CACNA1D     | 0.55 | 0.5  | 0.82 |
| ATP2A3      | 0.5  | 0.33 | 0.74 |
| CALM2       | 0.38 | 0.26 | 0.7  |
| NDUFS2      | 0.35 | 0.28 | 0.71 |
| NDUFS6      | 0.35 | 0.28 | 0.68 |
| IL1B        | 0.32 | 0.26 | 0.65 |
| ADAM10      | 0.29 | 0.24 | 0.7  |
| NDUFB7      | 0.26 | 0.14 | 0.62 |

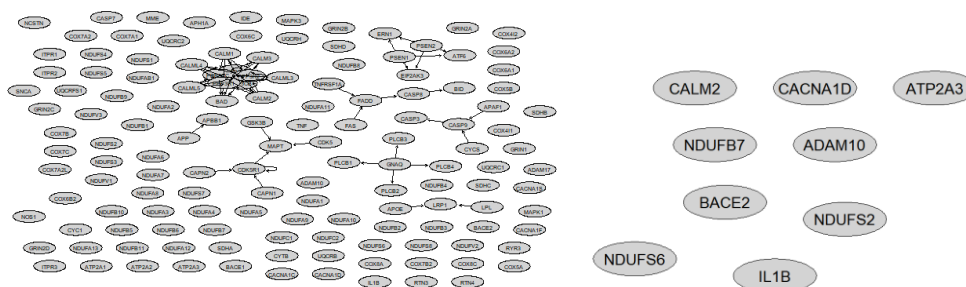

**Figure S59:** The network connectivity plots of the 140 genes (left) and the top selected genes (right) for pathway *hsa05010*.



**Parkinson's disease(*hsa05020*)**

There are total 35 genes in this pathway, among which 33 were mapped to the expression data. So we focused the analysis on the 33 genes. The prediction errors are 0.5144, 0.5242 and 0.5063 for IVGC, IV and EN, respectively.

**Table S60:** List of top selected genes with a stability selection rate >60% by using any one of the three methods (IVGC, IV and EN) for pathway *hsa05020*.

| Gene Symbol | IVGC | IV   | EN   |
|-------------|------|------|------|
| C6          | 0.96 | 0.99 | 1    |
| IL6         | 0.86 | 0.78 | 0.94 |
| LAMC1       | 0.85 | 0.75 | 0.84 |
| C9          | 0.79 | 0.71 | 0.92 |
| C8B         | 0.73 | 0.61 | 0.85 |
| C7          | 0.66 | 0.46 | 0.73 |
| SOD1        | 0.63 | 0.91 | 0.99 |
| PRNP        | 0.6  | 0.41 | 0.64 |
| IL1A        | 0.45 | 0.35 | 0.69 |

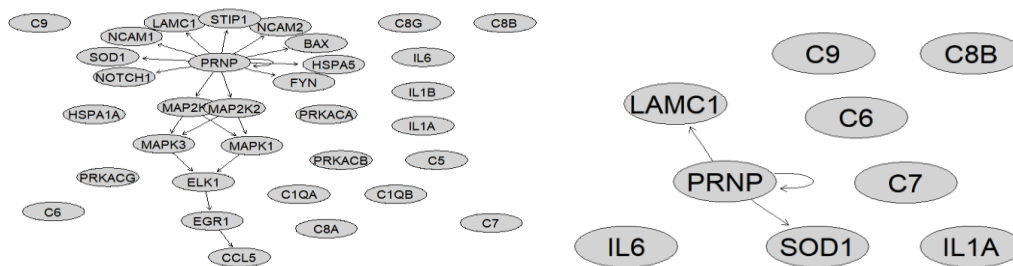

**Figure S60:** The network connectivity plots of the 33 genes (left) and the top selected genes (right) for pathway *hsa05020*.

**Amyotrophic lateral sclerosis (ALS)( *hsa05030*)**

There are total 49 genes in this pathway, among which 48 were mapped to the expression data. So we focused the analysis on the 48 genes. The prediction errors are 0.5343, 0.5752 and 0.5455 for IVGC, IV and EN, respectively. Although the selection rates of the top contribution genes in this pathway are higher with EN than both IVGC and IV, IVGC does have smallest prediction error among the three.

**Table S61:** List of top selected genes with a stability selection rate >60% by using any one of the three methods (IVGC, IV and EN) for pathway *hsa05030*.

| Gene Symbol | IVGC | IV   | EN   |
|-------------|------|------|------|
| DDC         | 0.75 | 0.58 | 0.91 |
| CREB3L1     | 0.75 | 0.55 | 0.92 |
| MAOB        | 0.69 | 0.42 | 0.86 |
| GRIN2D      | 0.66 | 0.4  | 0.76 |
| JUN         | 0.65 | 0.38 | 0.76 |
| CREB1       | 0.53 | 0.28 | 0.64 |
| RELA        | 0.37 | 0.27 | 0.61 |

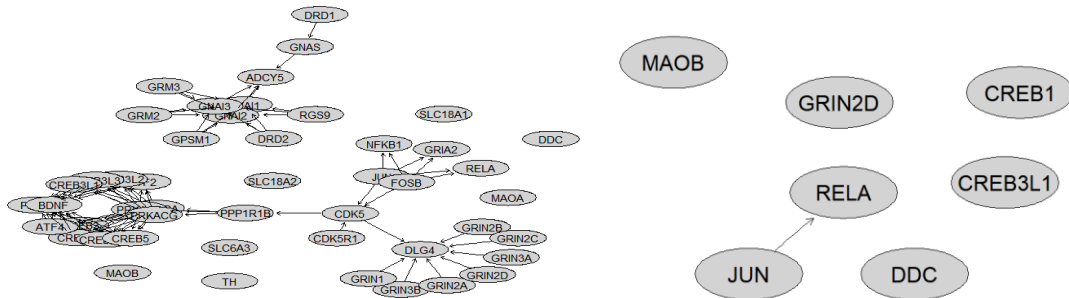

**Figure S61:** The network connectivity plots of the 48 genes (left) and the top selected genes (right) for pathway *hsa05030*.
